# Supplementary material
Source: PubMed Central journal article supplement (PMC11108344)
Supplement: 18_2015_2024_MOESM1_ESM.pdf [file 18_2015_2024_MOESM1_ESM.pdf]

**Online resource 1.** Complete coding sequences (collected or reconstructed) for bone morphogenetic protein (BMP) and decapentaplegic protein (DPP) used to construct the phylogenetic tree presented in Fig. 2. Dme, *Drosophila melanogaster*; Cin, *Ciona intestinalis*; Bfl, *Branchiostoma floridae*; Pma, *Petromyzon marinus*; Cmi, *Callorhinchus milii*; Ler, *Leucoraja erinacea*; Loc, *Lepisosteus oculatus*; Dre, *Danio rerio*; Ipu, *Ictalurus punctatus*; Ame, *Astyanax mexicanus*; Gac, *Gasterosteus aculeatus*; Oni, *Oreochromis niloticus*; Ola, *Oryzias latipes*; Ssa, *Salmo salar*; Tni, *Tetraodon nigroviridis*; Xma, *Xiphophorus maculatus*; Lch, *Latimeria chalumnae*; Amex, *Ambystoma mexicanum*; Eco, *Eleutherodactylus coqui*; Eco, *Xenopus tropicalis*; Aca, *Anolis carolinensis*; Gga, *Gallus gallus*; Cpb, *Chrysemys picta bellii*; Hsa, *Homo sapiens*; Mmu, *Mus musculus*

```
>DmeDPP (Fruit fly; Accession number FBtr0077773)
ATGCGACGTTTCGCGAACTGCCAGAATTGGTTGTTGTTGTCAGTTGCAGCCAAAGGATTTGTGGATTTTGGAGCGTAACTGA
GCGGCGTGCAGCAGGTGCACCAGAGTTGCAAGCGACCATGCGCGCATGGCTTCTACTCCTCGCAGTGTGGCGACTTTTC
AAACGATTGTTTCGAGTTGCTAGCACCGAGGATATATCCCAGAGATTCATCGCCGCCATAGCGCCCGTTGCCGCTCATATT
CCGCTGGCATCAGCATCAGGATCAGGATCAGGACGATCTGGATCTAGATCGGTAGGAGCCTCGACCAGCACAGCATTAGC
AAAAGCATTAAATCCATTTCAGCGAGCCCGCCTCGTTCAGTGATAGTGATAAAAAGCCATCGGAGTAAAACAAAACAAAAAAC
CTAGCAAAAGTGACGCGAACCAGAGTTC AACGAAGTGCATAAGCCAAGAACAGACCAATTAGAAAATTCCAAAAATAAG
TCTAAACAATTAGTTAATAAACCAACCACAACAAAATGGCTGTCAAGGAGCAGAGGAGCCACCACAAGAAGAGCCACCA
CCATCGCAGCCACCAGCCAAAGCAGGCCAGTGCATCCACAGAATCTCATCAATCCTCGTCGATTGAATCAATCTTTCGTGG
AGGAGCCGACGCTGGTGCTCGACCGCGAGGTGGCCTCCATCAACGTGCCCGCCAACGCCAAGGCCATCATCGCCGAGCAG
GGCCCGTCCACCTACAGCAAGGAGGCGCTCATCAAGGACAAGCTGAAGCCAGACCCCTCCACTCTAGTCGAGATCGAGAA
GAGCCTGCTCTCGCTGTTCAACATGAAGCGGCCGCCAAGATCGACCGCTCCAAGATCATCCCCGAGCCGATGAAGA
AGCTCTACGCCGAGATCATGGGCCACGAGCTCGACTCGGTCAACATCCCCAAGCCGGTCTGCTGACCAAGTCGGCCAAC
ACAGTGCGAAGTTTTACACAAAAGATAGTAAAATCGACGATCGATTTCCGACCACCACCGGTTTCGGCTGCACCTCGA
CGTGAAGAGCATTCCCGCCGACGAGAAGCTGAAGGCGCGGAGCTGCAGCTGACCCGGGACGCACCTCAGTCAACAGGTGG
TGGCCAGCAGATCGTCGGCAATCGGACGCGCTACCAGGTGCTTGTCTACGACATCACGCGCGTGGGGTGGTGGTTCAG
CGGGAGCCGAGCTATCTGCTGTTGGACACCAAGACGGTCCGGCTTAACAGCACGGACACGGTGGAGCCTCGATGTCCAGCC
GGCCGTGGACCGGTGGCTGGCGAGTCCGCGAGCGCAACTACGGACTGCTGGTGGAGGTGCGGACGGTCCGCTCCCTGAAGC
CGGCCCCACACCACCATGTACGCTGCGCCGACGCGGACGAGGCGCACGAGCGGTGGCAGCACAAAGCAGCCGCTCCTG
TTCACCTACACGGACGACGGGCGGCACAAGGCGCGCTCCATTCCGGACGTGTCTGGCGGAGAGGGCGGTGGCAAGGGCGG
CCGGAACAAGCGGCAGCCGAGACGGCCTACGAGGCGCAAGAACCACGACACACCTGCCGGCGGCACCTCGCTGTACGTGG
ACTTCTCGGACGTGGGCTGGGACGACTGGATTGTGGCGCCTCTGGGCTACGATGCATATTACTGCCACGGGAAGTGCCCC
TTCCCGCTGGCCGACCCTTTAACTCGACCAATCACGCCGTGGTGCAGACCCTGGTCAACAATATGAATCCCGGCAAGGT
GCCGAAGGCGTGCTGCGTGCCACGCAACTGGACAGCGTGGCCATGCTCTATCTCAACGACCAAAAGTACGGTGGTGTGTA
AGA ACTACCAGGAGATGACCGTGGTGGGCTGTGGCTGTTCGATAG
```

```
>CinBMP2/4 (Sea squirt; Accession number ENSCINT00000034715)
ATGGTGGCGCTTACGGATTGGACTTTACTCGCGACTCTGGTGTGTCATTTTCTATTGGACGTGAGCTCGGGCCTCGTGCC
CAAGGTCGGCCGGAATAACTTGATACGGCAGGCCGCCAAATACACGAGCGACACCCGAGAGGAAGAGGACGCGATAGTCA
ACGAATATGAGAAAAGCCTGTTGAACATGTTTCGGGCTTAAGCGAAGGCCACCCGGAAGAAAGACTCCAGTCCCGCGT
ATTATGCAGCACCCTGTACAAGGTCACATGGGCGACTACTACGAGCCCGAACCTAAGATCGTGACGTGAGGAAACCGG
TTTTGATCTTCCGCATGAAAGATATTGCGAGCCGGGTTAACACTGCTAGAAGTTATACCACGAAGATAACGAGGAGCATT
ACCCCGGGATGCCGAGCAACCACATCCGGCTACGATTTGACATCAGTACGATGCCGAGTGAAGAGGTTATCGGCGCTGCA
GAGCTTCTCCTGCATCGAGAGGCAGTGTGGCATCATGTAACATCAGGCCAAGGCCACATGCATCGCTTGAATATATACGA
GATCGTCAAAAATGCCTCCGGACGATGGGGGAAGAGCAGGGAGCCGTTTTGGAAGCCGACCCCAACCTATTACTCGGTTAC
TGGACACGAGACTCATAGACACCCGGAACACAACCTTGGGAACGGTTTTGATGTTAGTCCAGCTACCTTGCTATGGTCCAGG
GTCGCGCATAAGGAGAACCATGGTTTTAGTGGTTCGAGGTGGTGAAGAAGATGAACAAAATACCGCCGCAAGGTGACGCTGA
GCGACATGTGCGCTGAAACGTGATGTGCACCACGATGTTTCGGACCGAGAGTGGGTCCATCTAAGACCAATGCTTCTCA
CTTATTCGCACGACGGAAGATACTCGCTGCGTGGCGCAAACGTAGTAGTAGAAACCGCGACTCCTCTAACTCAAGT
TCTGGAAGAAAAACCGTCCGGAAGAAACGAAAGCGTCAAATGTTTGTGTCAGCGGCATGACCTCTACGTGGACTTGCTGAG
GTCGACTGGACGACTTGGATTGTTGCTCCACCGGGCTACGACGCCTACTATTGCCAAGGACAGTGCCCGTTCCCAATGTC
GGATCATTTGA
```

```
>BflBMP2/4 (Lancelet; Accession number AF068750.1)
ATGATTCGGGCGTTCGAGTCAAGTCTGCTCAACATGTTTCGGATTAAACGAGCGACCACGGCCCCGGAAGAACCCTGGTGAT
TCTCCCTACATGTTGGAGTTGTACCTCAGCCAGACGAAAGACCCTGAAAACCCAGTGTCAACTTCAACTTTGCGGGAA
AGTCAACAAGTACTGCCAACACCGTGCAGTGTTCACCATGAAGAAGAATCGGAGGCAGGGCAGCCGGTGGGAGGGC
GACGACGAGATCGACCGGCGATTATGGTTCAACACAAGTCCGCTCCCCAGCGTGAACCTATAAAGCCGGCCGAGTTACG
CTTGTTCGGGAACAGATCGATGTTGATCACGTTACGACGAGACTCCACGGACCACCACTTGTACCGAGTAAACGTGT
ACGAGGTAATGAGACCGAACAGTAGGACTAACACGGATACCATAACCGGCTTCTGGATACCAAAATGGTGGATGTTTCGT
AATTCGTCGTGGGAATCCTTTGATGTCCGGTCCGGCTGTTACTAAGTGAAGAATTCCCGGAGCGAAACTACGGGTTGGA
```

GGTCGAAGTGGTGTCTCCAAAGCGCGGGGCCCTATCAAACCACCACGTACGGTTACGACGGTCTACAGACATGGACGACC  
ACTCGTGGCAGCACCAGACCGCTGCTGCTCACGTACACGGATGACGGCAAAGGTTCCAGTAACAGTAATAGGGTCGCC  
TCCAGGCAAAAACGCGCCAATGGAAGAAAAAACAGCGCGGAGACTCAAAGCCAACTGCAGGAGACATTCGTTGTATGT  
TGACTTCAGTGATGTTGGCTGGAATGACTGGATTGTAGCTCCACCTGGCTACCAGGCCTACTACTGCCACGGGGAATGCC  
CCTTTCCCTCGCAGATCACCTCAATTCACAAACCATGCAATAGTTCAAACCTCTAGTCAACTCCGTAAATCCTCTCGCA  
GTGCCAAGGCCTGCTGTGTGCCTACAGATCTCAGTCTATTAGTATGCTATATTTGAACGAAAATGATCAAGTTGTTCT  
CAAAAACACCAGGACATGGTCTGGAAGGATGCGGGTGCCGTTAG

>PmaBMP2/4a (Sea lamprey; Accession number AY602220)

ATGCTTCTGCTCGTAGCCCTTTGCTTCCCGGCCGAGAGCGAAAGCGGCAGGAGGCCGCCACCGCCTCCGGGCGCCACGAG  
CGATGACGGCGACGCGCTGGCCCGAGGGCGCGCCACGCCGCCGACGGCCTCACGCGGCACGTGAGGGCCAGCTGCTCG  
GCATGTTCCGGCTGCAGAGGCGGCCTCGCCCGGGCCCGCGCCGTGGTGCCACCGTACATGCTGCAGCTGTACCGGGCC  
CTGCACGGGGCCACAGTGGGGCCCGTGACGTGGGACGGCCCTGGACCGTTTGGTGGCGCGGCCCGGAGCCAGGCCAA  
CACCGTGGCAGCTTCCATCACGACGAGTCCGCGGAGCACGTGCCGGCCGACTCGGGCGACAGCACGGCACGGCGGCTGC  
TGTTCAACGTGAGCAGCATCCCCGACGGCGAGGTGATCACCTCGGCGGAGCTGCACGTCTACCGCGAGCGCCTGAGCAGC  
CCCGGAGCGCCGGCCTCCACCGCATCAACGTGTACGAGGTGCTGCGGCCCGCGGCCGCGGACGGGACGCCCATCGCCCG  
CCTCCTGGACACGCGGGTGGTGCACCTCCGGCCGACGAGTGGGARGCCTTTGACGTGAGCCCCGCCGCGGTGCGCTGGG  
CCGCCACGAAAGAGCCCAACCACGGCCTGCTGGTGGAGGTGCAGCACCTTGACGGAGGCACGCCCGAGAAGAGGGCGGCAC  
GTGCGCATCGGCAGGTGCTGCACGCCGAGGCGGTGGCGGGCGGCCCGCCGGGACGGCGCCAGCGAAGGGGGCGACGGAGG  
GGAGGGCTGGCCGACGCTCAGGCCTCTGCTGGTGACGTTTCGGCCACGACGGGAAAACGAGGGACGAGGGGACGCTGCTGA  
GGCCGCGCCCCAAGCGCAACTCGCGGCCCAACAAGGGAGGCCGTAGGGGTGAGGGCAGTGCGCCCGCTACCCCTCTGTAC  
GTGGACTTCAGCGACGTGGGTGGAACGACTGGATCGTTCGCGCCGCCAGGATACAACGCCTTTTTCTGCCAGGGCGAGTG  
CCACTTCCCGCTGCCGACGACCTCAACTCCACGAACCACGCGATCGTGCAGACGCTCGTCAACTCGGTGAATCCCAGAG  
TGCCGCGCGGTGCTGCATCCCCACGGAGCTGACGCCGATCGCGCTGCTGTACCTGGACGAGTACGAGAAGGTGGTGTCT  
AAGAATTACCAGGACATGGTGGTGGAGGGCTGCGGGTGCCGCTAG

>PmaBMP2/4b (Sea lamprey; Accession number AY602221)

ATGATCGGAAGCGTAGGAGGACTCGGAACGCGACGAGGAGGAGGAGGATCTGAGAGACGCGCAGACCTCCTCCTGGC  
AGAAAAGTCTCCGGCGACAACGCTCGGCCGCGATGACGAGGAGAAAGCGCGGAGTGGGAACTCGCGGCGGCTGCTGGAGG  
AGCTGGAGGGGAGGCTGCTCGGGGTTTTCGGGCTGCAGAGGCGACCACGACCCGGCACGGGGATCGCAGTGCCCCGCTAC  
CTCGTGACGCTTACCCTGCCAGCAGCACACGGGGCGCGGAGGCGGCCCCCGACGGCGATGGGCCCGGGCAGACAAGGA  
GCGTGTGGGCAAAGACGATGTGGATGTGAGGAGGAGAAGGAGGAGGTGCGATTTCCACGGGAAGCGCAAGGAAGAGCAA  
ACACCGTCCGAGGGTTTTATCACGACGAGTCTACGGAGAAGCTCTCACTTGGGCAGAGCACGGAAGACGGAACAACGTGG  
CACTTCCCTCTTCAATCTCTCGTCCATCCCGACTCTGAGGAGGTGACTGCGGCTGAACTGCGCGTGCACCACACACGCGT  
GCACAGCCCATGTCCCTCATCTCGCCGGCATGCGAGTTGGCCCTCGGCTGGAGCGCATCAACGTGTATGAAGTTGTGG  
CGCCGCCATCGTCTCCATCGGGCGCTGCCTCCCGGCTGCTGGACACTCGCGTGGTGCACAAAACGAGTGCAGCTGGGAA  
GCGTTCGACGTGAGCCCCGCCGTGTGCGCTGGACCCGGGGCTCCGCACCTAACCGGGGCTTCGCGAGTCGAGGTGCTGCC  
CGTCCGGCGGCCAAGTGGCGGGGTGGCCGCCAATGGCGTGCCAGCGAGGCGGTGCTCGCGCAGCCCCGCTCGGGCGTGC  
CCTCGCTCTTCCCGGGCGATGGGAGCCACCAGACCAGCCGAGACCCTCCTCGTCACTTTTGGCAGCGACGGCCGGGCC  
CCATTACGCCCGGAGCCGTGCAAGGAGGAGCATCGCGGGGCCCAAGGACAGGCGGCACAAAGGCGAGGCGCAAGCC  
CGCTACAGCTGCGAGCCAGCGCTCTACGTGACTTCCGCGAGGTGGGTGGAATGACTGGATTGTGGCGCCGCGCCG  
GGTACCACGCTACTTCTGCCACGGCGAGTGCCCTTCCCTCTGGCCGACCACCTCAACTCGACGAACCACGCCATCGTG  
CAGACGCTCGTCAACTCGGTGAACGCGAGCATCCCTCGCGCTGCTGCGTGCCACGGAGCTCAGCCCCATCTCCATGCT  
CTACCTGGACGAGTACGGCAAGGTGGTGTCAAGAACTACCAGGACATGGTGGTGGAGGGCTGCGGCTGCCGCTAA

>PmaBMP2/4c (Sea lamprey; Accession number AY602222)

ATGAGCGAGTCTCGGCACGGCTTTGTGCTGCTGCTGCTGATTATTATGATGCCGTCAACACTGCCACCGTGCGCGGC  
AATGGATTTATCAACGTTCCGACGAGTCGATATCGTCAAGGAGGAACCGGGCGCACAAGTCTCTCGGCGTTTTCTGTCG  
CCACCGCCGGTGCCACAAAACATATTCCTCGTGTGTCATCATCCGCCGCCGCTGTTGCTGCTTTCGTCGCTTTCGTCATCG  
GAGAGCCAACGACTCCTGCAAAAGGACCTCGAGACGCGGCTGCTGGAAGTGTTTCGGCCTGAAGAGGGCGGCCGAGACCCAG  
GCCAGGCGTTGCGGTATCCAGTACCTCGTGGACGTCTACCGCTTCTGCAGACCGCCGGGCTGGGGCCAAGCGGGCCCG  
GGGGTCCCAGCGGGCTCCGCGTCCGAGTTGGAATCCGATTTGGGGTTTCGCGGAGCGAGCGTCCGGCGATGGCCAACACA  
GTGAGGGGCTTCCACCACGAAGATTGCTTGGAGGAGCAGCCTTACCACGGCCAATCGGGCGGGCGAGCGGGCTGCTCGTC  
GTCCCACCACCACCAACACCACCGCCTGGTCTTCGACCTGTCCAGCCTCCCCGCCGACGAGTGGGTGCACGCTGCCG  
AGCTGCGCTCCACCGGGCCCGGCTGCGGCCACCGCGCCGTGGGCCGCCGCTCCGCGTCAACGTCTACGAGGCGGGCG  
GCGACGGCGGGCAGCCTCCTCGACTCGCGGCTCGTGACGACAACGCCACGCGCTGGGAGAGCTTCGACGTGAGCGCCG  
CCTCCAGCGACGGGCGCTCAGCGGGCGGCCAGCTCCAGCCTCGGCCTCCTCGTCAAGTTGCTGCCACCCCCGGGGAGG  
ACGCGCCGACGAGCGACGACGCGGCGGCGGACGACGCGGCGGCGCCACGTTGGCCACGTGCGCGCCAGCCGCGGGCC  
GTACCGCCGCGGGCCCGCTCGCCTGAGGACCTCGACTCGTGGCCGCGGCTCAGGCCGCTGCTCGTCACTACGGCCACGA  
CGGGAGGGGCGGCCAAGCTTGGGCGAGGCGAGGGCGAGGTCCCGCGGGCGTCCGGGAGGCACGCGGGCGGGCGGCTC  
CGCGCGTGTCTGCCAGCGCCAGCCGCTCTACGTGGACTTCCGCGAGGTGGGCTGGGACGACTGGATCGTTCGCGCCCGG  
GGCTACAACGCTACTTCTGCCAGGGCGAGTGCCCTTCCCGCTCGCCGACCACCTCAACTCGACGAACCACGCCATCGT  
GCAGACGCTCGTCAACTCGGTGAACGCGAGCATCCCGCGCGCGTGTGCGTGCCACCGAGCTGAGCCCCATCTCCATGC  
TCTACATGGACGAGTATGAGAAGGTGGTGTCAAGAACTACCAGGACATGGTGGTAGAGGGCTGCGGCTGCCGCTGA



CGCCAACACCGTGAGGAGCTTCCACCATGAAGAACAACCTTGGAGCTGATGCCGGGGCAGAGGCAAGATAACCCAGCTTCGCT  
TTGTGTTCAACATCAGCGCGGTGCCGGCAGCGAGGTGCTCTCGTCCGCGGAGCTGAGGCTGTACCGGGAGCAGATCGAC  
ACGGTGTGAACCTGGAAGGAAGGGTCCATCGCATCAACGTGTATGAAATCATGAAAGCCTCCGGCCGGCAGGGCGACCT  
CATCACCAGGCTGCTCGACACCCGGCTCGTCCACCAGAACAAGAGCCGGTGGGAGAGTTTCGACGTGAGCCCGGCCGTGC  
TGAGATGGACCTCCAAAGGCAACCAACCAGGGCTGGCCGTGAGGTGATTCACCTGAACGAGACGAGGAGCCGCCAG  
GGTATGCACGTGAGGATGAGCAGGTGCTTCGCCAGACGTACGGAGACTGGTCCCAGTTCCAGACCTTGTAGTACTTT  
CAGCCACGACGAAAGGGGCACGCACCTGATCCGCAGGGCCAAACGCAGCGGCAAGGGTCCGAAGCGCAAGAAGAACAGGT  
CTCACTGCAGGAGACACTCTCTATGTGGATTTAGCGACGTGGGCTGGAATGACTGGATTGTGGCACCCTGGGTAC  
CAGGCTTTTTACTGTCACGGAGACTGCCCTTCCCACTGGCAGACCACCTGAACTCGACCAACCACGCGATCGTGCAAAC  
GCTTGTAATTTCTGTAATTTCCAACATCCCCAAAGCTTGTGTGTCCCCACGGAACCTCAGCCCCATATCAATGCTCTACT  
TGGACGAATACGATAAAGTTGTGCTGAAAACTATCAGGAGATGGTCTGGAGGGATGTGGATGCCGCTGA

>LocBMP2 (Spotted gar; Accession number AHAT01009032)

ATGGTGTGCTGCTCTGTCTCAGGTGTTGCTCGGAGGTTCCGTCCGACTTATTCCGGAGGTTGGCCGAAGGAAGTTCAGCGA  
ATCGTCTCGGCAAAGCACGCAGCAATCGGAGGACGTTCTTAACGAATTCGAGCTTCGCCTCCTTAATATGTTTGGACTGA  
AGCGCAGACCAACTCCAAGCAAGCTTGCGGTGGTCCCGCAGTACATGGTGGACCTCTATCACATGCATTCAGGGAATGGA  
GATCAGGACCCCAACCGCTCCAGATCAGTGTGGGCCAGTATTCCGAAAGGTCTGCCAGCAGAGCGAATACAATTAGGAG  
TTTTCCACCATGAAGAATCCTTGGAGGCACTTTTGAGCATCGGTGGAAAAACAACACAGAAATTTCTTCTCAACCTGACAT  
CCATTCCTGGGGAGGAAATAGTCTCTGCTGCAGAACTGAGGATTTTTTCGAGATCAAGTCTTAGGTGCCATTACAGACAGC  
AGTGGTGGTTACCATCGCATTAACATTTATGAAGTTCTCAAACCAGCCTTTTCTCAAAGGAACCTATAATAAGACTTTT  
GGATACTAGATTAGTGAACACAGCCAGAGCAAATGGGAGAGCTTTGATGTGAGCCCTGCTATAATGCGATGGACCATGG  
AAGGGCTTACCAACCATGGTTTTATGGTGGAGATTGTCCATTTGGACAATGAAGGGGGGAAGCAAAGAGGCATGTGAGG  
ATCAGCAGGCTTTGTCATGAGGATGAGGAAACATGGCCTCAGATGAGGCCTTTATTAGTGCATTTAGCCATGATGGCAA  
GGGACAGTTCCTCCATAAAAGGGAGAAACCGCAAACAGCAAAGCAAAGAAAGAGGCCTAAAGCCAGTCGAAAAGAC  
ATGAGCTATACGTGGACTTCAGTGTGTTGGGTGGAATGACTGGATAGTTGCCCCACCAGGATATGCCTTTTACTGC  
CAAGGAGAATGCCCTTTTCTTTAGCAGACCACCTAAACTCCACAAATCATGCTATTGTGCAAACCTTTAGTCAACTCAGT  
TAACACAAACATTTCCAAGGCCTGCTGTGTGCCTACAGAACTCAGCGCAATTTCTCTGCTCTACCTTGATGAATATGAAA  
AAGTTATATTAAGAACTACCAGGACATGGTTGTGGAGGGCTGTGGTTGCCGTTGA

>LocBMP4 (Spotted gar; Accession number AHAT01019072)

ATGATTCCTGGTAATCGAATGCTGATGGTCATTTTTATTATGCCAAGTCGTAAGTAGGAGAGAGCAACCATGCTAGTCTAAT  
ACTGGAGGAAGGAAAGAAAAAGTGTCCGAGCTGCAGGGCCGTGCTCTGGGCAAAGCCATGAATTTGTTGCGGGACTTTG  
AGACCAGCTGCTGCAGATGTTTGGGCTGCACCAACGTCCAGGCCAGCCGCTCCGCAGTGGTGCACAGTACATGCTG  
GACCTCTATCGCCTGCAGTCCGGGGAGGCAGAGGAGGCCGGCGCTGTTGATGCCAGCTTTGAGTACCCCGAGAGGTCAGC  
CAGTCGAGCCAACACAGTGGAGGCTTCCATCACGAAGAGCACCTGGAGCGCGTGGAAAGGCGAGCAGGAGAAGCTCGGACA  
CTCCTCTCCGCTTCTTCTCAACCTCAGCAACATCCCCGAGGACGAGGTGCTGTCTCAGCGGAGCTCCGGCTGTACCGG  
CAGCAGGTGGAGAACGCGGACCAGCACGGGGAGGCCGAGGGGCTCCACCGGATTAACGTCTACGAGGTCTCAAGCCCCC  
CCGGGCCACGCAGCTCATCACGCGGCTCCTGGACACCAGACTCGTGCGGCACAACGCCTCGCGCTGGGAGAGCTTCGACG  
CCAGCCCGCCGTGCTGCGCTGGACACGGGACAACTGCCAACCACGGCCTGGCCGTGGAAGTCTCCACCTCAACCAC  
ACCCCAAGCAGCAGGCGCCCATGTGCGGCTTAGCCGCTCCCTCCACCGGACCCCGGAGGACTGGGCCAGCTGGGCCAGCTGG  
CCCCCTGCTGGTACCTTCGGCCACGACGGCAAGGGCCACCCCTGACCCGGCGGGCAGGCGAGCCGCGCGTG  
CCCGCCGGAAGAACCGGAACGTCAGGCGGCACACGCTGTACGTGGACTTCAGCGACGTGGGCTGGAATGACTGGATAGTG  
GCACCGCTGGATACCAGGCTTTTACTGCCAGGGGATTGCCGTTTTCTCTGTGACACCACCTGAACTCCACCAATCA  
CGCCATCGTGCAGACGCTGGTGAACCTGTCAACACCAAGATCCCCAAGGCCTGCTGCGTGGCCACAGAGCTCAGTGCCA  
TTTCCATGCTGTACCTGGATGAACACGACAAGGTGGTCTCAAAAACCTACCAGGAGATGGTGGTAGAGGGTTGTGGCTGC  
CGTTAA

>LocBMP16 (Spotted gar; Accession number AHAT01023895)

ATGTTCCCTGCTAATCTCCTGGTCTGATGGTCTGTTGCTACCTCAAGTCGTGTCAGCTCGCGAGGGGGCTTCTGACCC  
GAGCACACCGCCACAGCTCAGCCTGGCTCAGACCATTGAGAACTTGTGCTGACCCGGCTGGGCCTGCGGAACCGGCCCG  
AACCCCGTCCAGGAACCCCATCCCGCAGTACCTGCTGGACGTCTACCGGTTCCACTCCAGGACTTCCACCTGATTGAG  
GACCCGGGCTTACAGTTCCCCACCAGGCATACCCAGGGCGCAACACCTCCGCAGCTTCCACCCCTGGAGACTCCAAG  
ACACCTCCTCCCGAGTAGCCAGGGGAAACAGACAGCTTCCACATCGTATTCAACGTCTCGTCCATTCCCAGGGACGAGC  
GGGTGACATCAGCTGAGCTTCGCCTCTCCCGCAGGGAGCAGTCTGTGCCCTCCGGGACTCAAAGGGTTAACTTATACCAG  
CTCCCTGATCCCAGGAGCCCAGCAGACACCAGACCCGGCTCCTGGCGTCCAGGCTGCTGGCAGATGACCACGATTCGCA  
CTCCTGGGAAAGTTTACGCTTGGCGCGGACTTGTGTTGACACACCAATGGCCAGACGCACCATGTGGCATTTCGTGCTGG  
AGGTGACGCACCTGAACAGCAGCCGCCCTCCGGAGCAGCAAGGGAGCGTTTGGGGTCAGGAGATCCGTGGGCCAGGAC  
CAGCCAGCTGGGCCAGGAGACCCCTCCTGGTACCTACAGCCAGCAGGGAGGGCCAGCCCTGGCCAGGAAAGAG  
GGTCCGAGCCCAGGAGGACCCAGGGCCCTGGGAGAGAAGGGTGAAGCGCAACGGCAGGTTGCACAAGCTCAAGAAGATGG  
CCAGGGCGCGTGCAGGAGGCACCCCTCTACGTGGACTTCAAGGACGTGGGCTGGAACAAGTGGATCGTGGCTCCAGT  
GGCTACCACGCTTCTTCTGATGGGGAGTGCCGCTTCCCGTGGCCGACCACATGAACTCCTCCAGCCACGCCATGGT  
GCAGACGCTGGTCAACTCGGTCAACAGCAACGTGCCCGGGCCTGCTGCGTGGCCACCACACTCAGCCCCATCGCCATGC  
TCTACCTGGACCAGCACGACCGGTTGGTGTCAAGAACTACCAAGACATGGTGGTGGAGGGCTGCGGCTGCAGATAA

>DreBMP2a (Zebrafish; Accession numbers NC\_007128, CABZ01062106, CAAK05040443, NM\_131359, BC163036, BC163048, EH593053, EH610560, CT616046, CT616047, BM187205 and AI878481)  
ATGGTCTCGTCCACCGCCGCGCTAATGGTCTGATGGTCACTCAGGTGTTTTTTGCGGGCTCCAGTGGACTCGTTCTCA  
GGTCGGCCGGTCCCTCTGTCTCCGGACGCTCGACCGGTTTGAAGTTTGGCTTCTGAGCATGTTTGGGCTCCAGCACA  
GACCCACTCCCAGCAGCTCCGCAGTGGTTCCTCAATACATGCTGGACTTGTACTCGGCGCACTCCGTGAACGCAGAGCAG  
GTTAGCAGACCCAGAGCTCACTTAGGGAAAGGCTCCGAGAGATCCGCCAGCAGAGCCAACACTATCAGGAGCTTCCACCA  
TGATGAATCTACAGAAGATCTGTCCAGCTCCAGTGTAGGACGACGCGGTTCTCTTCAACCTGACCTCCATCCCAG  
ACGAGGAGTTGGTGACGTCAGCAGAGCTGCGCGTTTTTTCAGAGAGCAGATCGTGAGTTTCGCTAAACAACGCAAGTGC  
TTTTACCGCATTAACGTTACGAAATCATCAGGCCGTCGGTTCTCTTTCAGGAGCCCATCACTAGACTCTTGGACACCAG  
GCTTGTTCACACAGCTTGGAGAAATGGGAGAGCTTTGACGTAACCTCTGCTGTATTAAAGTGGACCACAGACGGACACC  
CTAACCATGGGATATTGGTGGAAATATCACACCCAGATCAAGACTCCAGAAAACATGTGCGCGTAAGTCGGTCCCTTAC  
AACAAATGAGGACACGTGGTCTCAAATGAGGCCGCTTTTGGTGACCTACAGCCACGATGGAAAGGGAAACGTGCTGCATTC  
TCGTGAAAAACGACAAGCGAGGAATAATAAGCAGAGAAAGAAGCATAAAGCAAACCTGCAGGAGACATTCCTGTACGTGG  
ACTTCAGCGACGTAGGCTGGAATGACTGGATTGTGGCGCCGCCGGGTTACCATGCATTCTACTGCCAGGGCGAGTGCCCG  
TTTCCACTGGCAGACCACTTAAACTCCACTAACACGCTATCGTGCAGACACTGGTGAAGTCCGGTGAACAGCAACATTC  
CCGAGCCTGCTGCGTGCCACTGACCTCAGTCCGTTTTCTCTGCTATATCTGGACGAGTACGAGCGGGTCATCTAAAAA  
ACTACCAGGACATGGTGGTGGAGGGATGCGGGTGCCGCTGA

>DreBMP2b (Zebrafish, Accession numbers NC\_007131, CABZ01042685, NM\_131360, BC114256, BC076076, D49971, DRU82232, EV759768, EV756104, CT619514, DR722644, CK400445, DR719530, CV481651, CV481676, CA588097, DV586788, CK692216, AI959065, BI889767, CK696508, EB853879, EB852282, BI889738, CT619515, FP160298, FP160299, EB835261, EB976237 and CA588098)  
ATGGTCCGCGTGGTCCGCGCTCTCACGGTGTGTTGCTCGGTCAGGTGTTGCTGGGAGGTGCCGTTGGACTCATTCCCGA  
GATCGACCGACGGAAATACAGTGATTCGGGGAGACACACACCGGAGCGAACTGATACAAACTTCTGAACGAGTTTGGAGC  
TACGCTTGCTCAATATGTTCCGATTGAAGCGAAAACCCACCCCAAGCAAATCGGCAGTGGTCCCTCAGTACATGCTGGAC  
TTGTATTATATGCACCTCTGAAAACGATGACCCGAACATTTCGGCGCCCGAGGAGCACTATGGGAAAACATGTAGAAAGGGC  
AGCCAGCAGAGCAAACACGATACGAAGTTTTTCATCACGAAGAGGCTTTTCGAGGCACTGTCCAGCCTGAAAGGAAAAACAA  
CGCAGCAGTTTTTTCTTCAACCTTACCTCCATTCTGGCGAGGAGCTGATCTCCGCTGCGGAGCTGCGCATTTTTCAGGGAC  
CAAGTTCTCGGAGATGCCAGTACGAGTGGCTTCCACAGAATTAACATTTACGAGGTGTTTCAGGCCAGCTTTGGCCCCCTC  
CAAAGAGCCTCTAACAGACTTCTGGACACCCGCTCTGGTGCAGGACTCTCACACGCGCTGGGAAAGCTTCGACGTGGGTT  
CAGCTGTGGCAGCTGGGCCCGCAATCCCAGCACAACCATGGGCTCCTTGTAGAGGTGCTCCATCCTAAGGAGTCAGAA  
GTATCCGAGGAGGCTGAGAGCAACCGGAGGAAGCACGTGAGGGTCAGTCGTTCCCTTACGCGGATGAGGACTCGTGGGC  
ACAAGCCCAGCTCTGCTGGTAACCTACAGCCATGACGGTCAAGGCACAGCCGCTTTCGATTCGAACCGAGAAAAGCGGC  
AGGCTCGACGAGGGCAAAGCCGAGGAGAAAGCACCACCAGCGCTCGAACTGTAGGGCAGATGCTCTCTATGTGGACTTC  
AGTGATGTCGGCTGGAACGAGTGGATCGTGGCACCAGGCTATCATGCTTTCTACTGCCATGGCGAGTGTCCGTTCCC  
TCTGCCGACCATCTAAACTCCACCAACCATGCCATTGTCCAGACGCTGGTGAAGTCCGGTCAACTCCAACATTCCAAAG  
CCTGTTGCATCCCGACGGAGCTCAGCCCTATCTACTGCTGTACCTGGACGAGTACGAGAAGGTCATTCTTAAAAACTAC  
CAGGACATGGTGGTGGAGGGCTGCGGGTGCCGATGA

>DreBMP4 (Zebrafish; Accession numbers NM\_131342, D49972, DRU82231, DRU90122, DU730983, CT674533, CT619393, EB983652, CT599423, BI892288, BI886011, CK683872, CT599424, CN507552, CT619394 and NC\_007128)  
ATGATTCCTGGTAATCGAATGCTGATGGTCAATTTTATTATGCCAAGTCTACTGGGAGAAAGCAGCTATGCTAGTCTGAT  
ACCCGAGGAAGGGAAGAAGAAAGCGTCCGCTCTTACCTGGCTCAGAGTCATGAGCTGCTGCGGGACTTTGAAGCCACGC  
TGCTGCACATGTTTGGCTGCAGAGGCGTCCCAGACCCAGCCACAGCGCCGTCGTACCACAGTATCTGCTCGACCTCTAC  
CGCTGCAGTCAGGGGAGCTGGAGGAGGCAGGAGCGCAGCAGCTCAGCTTCGACTATCCTGAAAGATCCACCAGTCGAGC  
CAACACCGTGAGAGGATTCATCATGAAGAGCACCTGGAGGAGCTGCAGTCAGACGGCTCCCAGGAGACTCCTCTGCGAT  
TCGTTTTTAATCTCAGCAGCATCCCAGAGGACGAACTCATATCCACCGCAGAGCTTCGCGTCTACAGGCAACAAATAGAT  
GACGCCTTCTCAGACCCAGATCAAACAGGGGACCATGGTTTTGCATCGGATAAACATATATGAGGTGTTGAAGGCGCCACG  
GGAAGGACAGCTCATCACGCAGCTCCTGGACACACGTTTGGTGGAGGCACAACACCTCCAAATGGGAAAAGTTTTCGACGTTA  
GCCCTGCAGTGTGCGCTGGACCCAAGAAAAACGCTCTAATCATGGCCTTGTGTGGAGGTTGTACAAATGAAGCGAAAC  
CCAGTTCAAAGGGACGACATGTTTCGTGTAAGTCGCTCCGTGCATCCTCTTCCGGATGAAGAGTGGGACCAGCTACGCCC  
CCTGCTGGTCACATTCGGACATGACGGCAAAGTCAACCGCTGACTCGGCGAGCGAAACGCAGCCCTAAACAAAGAGGTC  
GAAAGCGTAATCGTAACCTGCCGGAGACATGCGCTGTATGTTGATTTTCAGGACCTAGGCTGGAACAGCACTGGATGTGGCA  
CCGCTGGATATCAGGCGTATTACTGTATGAGAGGTGCTCCCTTTCCACTAGCCGATCATCTCAACTCCACCAATCACGC  
TATCCTACAGACACTGGTGAACCTCGGTGAACACCAATATCCCCAAAGCCTGCTGCGTGCCCACTAGCTCAGCGCAATCT  
CCATGCTTTACCTGGACGAAACGGACAGGGTGGTGTGAAAACTATCAGGAGATGGTGGTTCGAGGGGTGTGGCTGCCGC  
TAA

>DreBMP16 (Zebrafish; Accession numbers NM\_001171776, FN400947, CABZ01023011, CAAK05042509, FN400946, CR381630 and CAAK05042510)

ATGTTCCCTGCTAGCCTACTGGTCTGATGATCCTGCTGCTACCTCAAGCCTCATCAGGTACCAGGAGGGTCCCAGTCA  
GACTCATGGAAAGCTGGACAGCCTTCTGGAGCCTAGTTTGGCCCATACCATCCAGAACCCTCTGCTAACCCGCTGGGCT  
TACAGTCGCACCCCAACCCAGTACAGAGGCACAAGTTCCCCAGTATCTTCTGGACTTGTATCGATTCCACACTCAACAG  
TACCATCTCATCGAGGACCCAGAATTTAGTTACCCCTCAAAGCATGTGCAAGGAGCCAACACAGTCCGATGCTTTCACCA  
CACAGATTTCCGACTCCGAGTCTCCAGAAGAGCAGAAGACCACAGTGGACGGCATCCACATAGGCTTCAACCTGTCTC  
CCATTCCTTCCAGAAGAAAGTGTGGTGTCCGAGAGTACGTCTACTCCATGAAGGGTCAAGTGGAGGTTCTCACGTGGCC  
AGTCTTTACCTTTCCAAACCAGTACCCTTTCATCAAACCCATTCTGTCCATTACAGTCAACTGACCAGAGACAGGAAGAG  
TGCCCAACTCTGGGAAACCTTTCCCTGGATAGAGAAGTGTTCAGAATTTATCCAAGACGTCAGGAAGCCTGTCTTTTA  
TCCTGGATGTTATTCCTGATAATAACAGCAGCAGTACTCTTCTAAAGACAGACATTTGCGAGTACGCAGATCCACATTG  
CAGGACGGGCCTACTTGGGAAAGGCAAAGGCCTTTATTAGTGACCTACAGTACAGTACGATGGCCGAGCAGCCTTTTGTGAA  
TCTCAATAAGCGTAAAAGCAGCCGAAGCAGGAGCAGATGGACCAGGTTAAGGGTGATAGGGGTGAGGGCTCTGACTGGA  
ATGAAAGGCGAGTAAAACGAAACAACAGGAGGGCCGAAAACCTCAAAGACTCTCCCGCGCTCGTTGTGTCGCGCACCCG  
CTGTACGTGGACTTCAAAGATGTGGCTGGAATAAATGGATCATAGCTCCATCTGGTTACGATGCTTTCTTTTGCCTCGG  
AGAGTGGCGCTTCCCAGTGGCTGACCATATGAATTCATCAAGCCATGCCATGGTGCAGACGCTAGTCAGCTCTGTAAACG  
GAGCCGTGCCGCGACCATGCTGCGTCCCTACAGCTCTCAGCCCAATCGCTCTACTCTTTCTGGACCAGGAGGAACGTGTG  
GTGTTGAAAACCTACCAAGACATGGTGGTGGAGGGATGTGGCTGTGCATAG

>IpuBMP2a (Channel catfish; Accession numbers JT279003, JT446579, JT413282 and  
JT376107)

ATGGTGGCCGGTGTTCGCTTTGCTCATCGCGCAGCTCTTCTTCGGAGGCTGCACGGGTCTCCTGCCGGAGATCGGGCGCCG  
CAAGAACAGCCCTCACCTCTCCAGGACGCGCTGGACGCTTTCGAGCTTCGTCTGCTCACCATGTTTCGGACTGAAGCAGA  
GGCCGAGTCCGAGCAAATCAGCAGTGGTCCCGCAGTACATGCTGGATCTGTTCCACCAGTATTACGCCAACAGTGGCCGAG  
CAAAGCACCAGAAAAGCAGAGCAGTGGCCAGGAGCGCAGCAGATCCGCTAGTCCGGCGAACACAGTACGAAGCTT  
CCATCATGATGAATCTACAGAGGAGCTGTCAGCTCAGTGGAAAGACGACTCAAAGGTTCTCTTTAATATGAGTCCCA  
TCCCAGGAGAGGAGTGTGTCACATCAGCAGAGCTGAGGATTTACAGGGAGCAGGTGATGACGAACAGTACGCAACAGC  
AGTGGCGGGTACCATCGCATTAACATCCACGAGATCATCAAGCCTGCACTTCCGTTTAAAGAGCCCATCACAAGACTTCT  
AGACACCAGACTGGTTCAGCACAGCCTGAGCAAGTGGGAAAGCTTTGATGTGAGTCTGCTGTCTTGGCGTGGACCAGGG  
AGAGTACACCAACCATGGCTTTGTGGTGGAGGTGGTTCACCCAGGCGATGCAGAAGGAGACTACAAGAGACATGTCAGA  
GTCAGTAGGTCGCTGCATGACAGCACAACCTCATGGCCTCAGATGAGGCCACTGCTGGTGACGTTTACGCCACGACGGCAA  
AGGACACGTGCTCCACTCTAGGAAGAAACGGCAAGCGCGAGTCAACAAGCCAAAGAAGAAACACAAGCCAACTGCAGGA  
GGCACTCGCTCTATGTGGACTTACGCGACGTGGGCTGGAATGACTGGATAGTGGCACCACCAGGCTACCATGCCTTTTAC  
TGCCAAGGAGAGTGTCTTTCCCTTTGGCAGACCACCTAAACTCCACTAACCATGCCATTGTACAGACACTGGTCAACTC  
GGTGAATAGTAACATTTCCCAAGGCATGCTGTGTGCCACAGACCTGAGCCCCATTTCCCTGCTCTATTTAGATGAGTATG  
AGCGAGTGATCCTGAAAACCTACCAGGACATGGTGGTGGAAAGGCTGTGGGTGCCGCTGA

>AmeBMP2b (Mexican tetra; Accession number DQ915172)

ATGGTGGCCGCGGTGCGCTCCGTCACGGCGCTGCTGCTGCTCGCTCAGGTGCTGCTGGGAGGCGTTGCCGCCGCGCTCGT  
GCCCGACGTGGAGCGGCGCAGGCCCGGAGAGCAGAGCTCGAGCTTCTTGCAGGAGTTCGAGCTGCGCCTGCTCAACATGT  
TCGGCCTGAAGCGCAGACCCACGCCAGCGGCGCCGCGCTCGTCCCCGACTACATGCTCGAGCTTACCACCTGCACGCG  
GGGGTGACGGAGGAGCGCAGCAGCAGCCTTACGAGGGCGCGCGGAGGAGGCGCGGACAGGCGGCGCCAGCCGCGGCG  
CAACACCATCAGGAGCTTCCATCAGAAAGAAAGCTTTTGGAGCCCTCTCCAGCCTGAAAGGAAAGACAACACAGCAGTTCT  
ACTTCAACCTCACCTCAGTGCCAGCAGAGGAGCTAATCACAGCCGCGGAGCTGCGCRTCTTACAGAGACCAAGTTCTAGGT  
GACTTTTACAAAGAGCAACAGCAGTGTGTCAGGTGGTTTTTACCAGCATAAACATTTTTYAGGTGTTTACAGCCAGCTCATTC  
CCTATCAGAGGAGCCTCTACCAGGCTGGTGGATACTCGTCTGGTGCAGGACTCTCATTGCGGGTGGGAGAGCTTCGATG  
TGGGCTCAGCAGTGGCGCGCTGGACCGCACACTCGCACCACAATCATGGCCTCCTGGTGGAGGTGCTTTCATCCTGAGGAG  
AGCAGTGGAGAGGAGCAGGCCGAGAGGAACAGGAGGAGGCAGTAAGGGTGGAGCCGTTCCCTGCACGCGGACGAGGACTC  
TTGGTTCGAGGCCCGGCGCTGCTGGTTACTTACAGCCACGATGGTAAGGGTACGCCCTCCTGCAGCCACACAGAGAGA  
AACGGCAGGCGCGGCGTGGGCCAAGCAGCGGCGGAAACCACACCAGCGCACCAACTGCCGCCGGCACCCGCTTTACGTG  
GACTTACGCGACGTGGGATGGAATGAGTGGATCGTGGCTCCGCTGGCTACCATGCCTTCTACTGCAACGGCGAGTGCCC  
CTTTCCGCTTTCTGACCACCTCAACTCCACAACACAGCCATAGTCCAGACTTTGGTGAAGTTCGGTAAACTCCAACATTC  
CTCGGGCTTGCTGCGTGGCCACAGAACTCAGCCCCATCTCTGCTCTACCTGGATGAGTATGAAAAGGTTGACTGAAA  
AACTATCAGGACATGGTTGTAGAGGGCTGCGGTTGCCGGTGA

>IpuBMP4 (Channel catfish; Accession numbers JT406104 and FI862280)

ATGATTCCTGGTAATCGAATGCTGATGGTCATTTTATTATGCCAAGTTGTACTGGGAGAGAGCAGCCATGCTAGTCTAAT  
ACCCGAGGAAGGGAAGAAAAGGCACTGGGTAATAACCCAGGTCAAAGTCACTGAAGTGTGCGGGACTTTGAGGCCACGC  
TGCTGCACATGTTCCGGCTGCAGAGGCGGCCACGGCCACGGCTTGGCAGTGGTGCAGTATCTGCTCGACCTCTAT  
AGCTGCAGTCAAGGAAAGTGGAAAGAGGCTGAAGTCAAGTGTGAGTCTTGAATATCTGAGAAGTCCACTACCGGAGC  
CAACACTGTGAGAGCATTCATCATGAAGAGCAGTGGAGCAAGTCCGCTCAGACAGACCCGTACAGCATCGAGACTCCTC  
TGCGTCTTTCTTTAACCTCAGCGGCATCCCTGAGGATGAGCTGCTTTCCACGGCAGAACTGCGGCTGTACCGGAAGCAG  
ATTGAGGAGCCTGGTTTGGAGTCCCAGCATGTGGGAAATGAGGACCTCCATAGGATCAATGTGTATGAGGTGCTGAAGCC  
ACCACAGCCCAGGACGCTGATCACACGCCTCCTGGACACACGCCTTGTAGCCACAACACCACCAGCTGGGAAAGCTTTG  
ACGTGAGCCCGGCTGTATTGCGTTGGACCCACGAGCGGTTACCAAATATGGACTTGTGTAGAGGTTCTGCATCTGAAC  
CAAACACCGCGGCACCAAGGCAAGCAGTGCAGCATCAGCCGCTCACTGCACCACACTTCAAGAAAACCTGGGACCAGCT

GCGTCCTTTGTTGGTCACTTTTCGGCCATGATGGCAAAGGCCACCCACTGACACGTAGGACCAAACGCAGCCCCAAGCAGC  
GAGGCCGTAAGCGCAACCGCAACTGCCGGCGACATGCGCTGTATGTGGACTTTAGTGACGTAGGCTGGAATGACTGGATA  
GTGGCACCACCGGGCTATCAGGCCTATTACTGCCACGGGGACTGCCCTTTCCCTCTAGCAGACCATCTGAATTCCACGAA  
CCATGCTATTGTACAAACACTGGTCAACTCGTTGAACAGCAATATTTCCCAAGGCCTGCTGTGTGCCACCGAGCTGAGTG  
CCATCTCAATGCTCTACCTGGATGAGACTGACAGAGTAGTCTTGA AAAACTACCAGGAAATGGTGGTGGAGGGCTGTGGC  
TGCCGCTAG

>IpuBMP16 (Channel catfish; Accession numbers JT415761, JT155730, JT424125 and JT148139)

ATGTTTCCTTGCTAGTCTTCTAGTTCTGATGACCCTGCTGCTTCCCTCCAGCCTTGTGAGCTCAACAGGTGGATTCCAGTCA  
CTCTGATGGGAACCCAGGAATCTCTCTCGAGCCCAGTTTGGCCCAGACCATCCAGAACCTCCTCTTGACCCGACTGGGCC  
TACAGTCTATCCAAACCCCTCACCCAGGAGCAGTGGTACCTCAGTATCTCCTGGACCTCTATCGCTTCCACACACAGCAG  
TACCACCTAGTAGAAGATCCAGATTTTCAGCTTTTCTGTGGAGCATGTAGAAGGTGCCAACACTGTTTCGCAGCTTCCACCA  
TGCAGTGTCTTTCAGACCTTTCACATCCCTGATGAGAAGAGTGACAGGATCCATATAGCTTTTAACTGTCTCTATTCCCTT  
CCTACGAGAATGTGGTCTCAGCAGAGCTGCGTTTTCTGCGTGGAGGAACACGCTGGGGTTTCAGAGCCTCACACTGTCAGC  
CTCTATGTCTCTGGTGGAAACATTGAGCCAACACTTCTCCATTACAGACAGTTAGTTAGAGAGCCCTCAGGGTCTTGGGA  
GGCCTTTCCCTCTGAACGCAAAACTGTTTTCAGAAGTTGTCTGATAGTGCAGGGAAAGTGGCCTTTATCTTGGAAAGTGACCT  
CAGATAACAGCAGTACGCTGTGGAGGACATGGACACAGAGGGACACTTGAGAGTGCCTAGGTCTGCAGGTGAAGATGAC  
TACAGCTGGGCACGCCAAAGACCCTACTGGTCACTTACAGCCATGATGGGCGCAGTGAACCATTTCATTTCCCTTTGGAAA  
GAAGAAGACCCCCAGGGGTAGGAGGGGGCGGTAACAAGGCTAAAAGCTCAAAGGTGAGGGCTCACAGGTAAGCTGGCGTG  
ATGTGTGGACAGACAAGCGGGTAAAGAGGAATAACGGCGGTGAGCAGCCAAGCTGAAACGCCTGTCTCGCTCTCGATGC  
CGCCGCCATCCCCCTACGTGGACTTCAAAGATGTGGGTGGAACAAATGGATCGTTGCACCCGACTGGTTACGACGCCTT  
CTTCTGTCTGGGTGAGTGGCGCTTTCCCTCTCGCCGACCACATGAACTCGTCCAGCCACGCCATGGTGCAGACACTGCTGA  
ACTCGTTAATGGAGCCGTGCCACGAGCCTGCTGTGTGCCTACGGCCCTCAGTCCAATCGCGCTCCTTTATCTGGACCAG  
GAAGATCATGTGGTTCTGAAAACTATCAGGATATGGTAGTGGAGGGCTGCGGCTGCCGGTAG

>GacBMP2 (Three-spined stickleback; Accession numbers DW637392, DW637393 and AANH01008393)

ATGGTCGCCGTGGTCCGCTCTTTCATGGTACTGCTGATCGCTCAGGTGTTGCTGGAAGGTGCTACGGGACTCATCCCCGA  
GGTCGGCCGGAGGAAATACAGCGAGTCCGGGAAGCAGACCCCCGAGCGGTGCGAGAGCTTCCCTCCACGAGTTCGAGCTCC  
GGCTTCTCAACATGTTTCGGACTGAGGCGCAGGCCGACCCCCGAGCAGGCAAGCCGTGGTGCAGCAGTACATGGTGGATCTT  
TACCGCATGCACTCAGCGAACGGAGACCACAGCGCCAAACGACCCAAGAGCATGGGGAGGCACGCAGAGAGGGCTGCGAG  
CAAGGCCAACACGATTAGAAGCTTTCACCACGAAGAGTCCATGGAGGCCCTGGCCCCGGCTGAAGGGTAAAACAACCCAGC  
AGTTCTACTTCAACCTCACTTTCGATCCCCGAGGAGGAGCTCATACCTCCGCAGAGCTCCGCGTCTACAGGGACCAGGTC  
ATGGGAGCCGCGGCCCCCGACAACAGCGCCGGGAACAGCAGCACTAGTGTGACGCGCCGGCGGGTGGCTTCCATCGCAT  
CAACATTTATGAGATATTTGGAGTTCCTCCGCCAAGGTGGGGAGCCCCCTGGCGCGTCTGCTGGACACTCGGCTAGTGC  
GGGACTCTTTGAGCCGCTGGGAGAGCTTCGACGTCAGCCCCGCGTGTCTCAGTGGACCGCCGGGAAAGGTGCGAACCAT  
GGCTTCATGGTGGAGGTGCATCACCCAGAGGAGGGGGCGACGGACGGGGAGCACGCCAGAGACGCAGGCAGGCACGTCAG  
GGTGAGCCGGTCCCTGCACCAGGACCGGGACTCGTGGCCTCAGGCTCGGCCTCTGCTGGTGCAGTACGGTTCAGACGGCC  
CGGGGACTCGGTGCTCCACAGCGGGAAAAGCAGCGCCAGGCGGCTCCGCAAAACAGCGCAGGAAGCACCAGCAAGGCC  
AGTCGCAAGAGCAGCCCTGTACGTGGACTTCAGCGACGTGGGGTGGAAACGAGTGGATAGTGGCGCCCGCCGCTACCA  
CGCTTTTACTGCCAGGGGAGTGTCCGTTCCCTTGGCGGAGCATCTCAATTCCACCAATCACGCCATCGTGCAGACGC  
TGGTCAACTCGGTCAACTCGAACATCCCCAGAGCCTGCTGCGTGCCCACTGACCTCAGCCCCATCTCCCTGCTCTACCTG  
GACGAGTACGAGAAGGTATCTGAAAACTACCAGGACATGGTGGTGGAGGGGTGCGGCTGCCGGTGA

>GacBMP4 (Three-spined stickleback; Accession numbers DT969085 and AANH01003910)

ATGATTCCTGGTAATCGAATGCTGATGGTCATTTTAATATGCCAAGTCTGCTGGGAGAGAGCAACCATGCCAGTCTGAT  
ACCTGAAGAAGGGAAAAAGAAAGTACCGGGCTGCAGGGTCTGTTCCGGCCTCTCAGAGCCATGAACTGCTGCGGGACTTTG  
AGGCCACGCTGCTGCACATGTTTGGCCTCAAGAAGCGGCCGCGGCCAGCCGATCGGCCTCGGTGCCTCGGTACCTGCTG  
GACCTCTATCGGCTGCAGTCAAGGGGAGGCGGAGGAGCCGGGGTGCACGACATCGCTTTTCAGAGTACCCGAGAGGTCAGC  
CAGCCGGGCCAACACTGTGAGGGGCTTCCACCACGAGGAGCAGATGGAGCGGGTGCACAATCTGGACGATGGAGAAACCG  
CCCCCTTCGCTTCCGTGTTCAACCTCAGCAGCATCCCGGAGGACGAGCTGCTCTCTTTCAGCCGAGCTCAGGCTCTACCCG  
CATCAGATCGACGAGGCCATCGGCGGCGCCTCGTCAGACAACCAGGGGCTTACC CGGATAAATGTGTACGAGGTGCTGAA  
GCCCCCCCCGGCCGGCCAGCTCATCACGCAGCTCTTGGACACGCGGCTCGTGCAGCACAAACGCGTGCAGCTGGGAGAGCT  
TCGATGTGAGCCCGGGTGTGCGCTGGACTCGCGAGAGCCTCCCGAACCACGGGCTGGTGGTGGAGGTCTGCACCTC  
AACCAGACGCCGCGCCACCAGGGCCGGCACGTCCGCTCAGCCGCTCGCTGCACCGGGAGCCCGGCGAGGACTGGGAGCA  
GCTACGTCCCCCTCTGGTTACCTTTGGCCACGACGGGAAAGGTACCCGCTGACCCGTCCGACCTGAGGCTGAACTGACTGG  
AGCGGGCCGCAACCGCAACCTGCCCGCCGACGCTATATGTGACTTCAGCAGTTCAGCAGTTCAGGCTGAACTGACTGG  
ATAGTGGCGCCCCCTGGTTACCAGGCCATTACTGCCACGGGGAATGTCCCTTTCTCTGGCGGATCATCTGAACTCAAC  
CAACCATGCCATTGTTTCAGACGCTGGTGAACCTGTGAAACAACAACATTTCCCAAGGCCTGCTGCGTGCCACAGAGCTCA  
GCGCCATCTCCATGCTCTACCTAGACGAACACGACAAGGTGGTCTCAAAACTACCAGGAAATGGTAGTGGAGGGCTGC  
GGTGCCTGTA

>GacBMP16 (Three-spined stickleback; Accession numbers DT979515 and AANH01003009)

ATGTTCCCTGCTAACCTCCTGCTCCTCATGGTCCTGCTCCTACCTCAAGCCTCGTCTGGTCGCCAGGGTGGAGTCACCAG  
CAAGACCGACCATGGCCGGGTGTCTCCATGCCTTCCTCCTTGTGCGCCCCACCAGCTGGTTCCTCCTCCTGGAGCCCA  
GTCTGGCACAGACCATCCAGAACCTCCTCTTGAGCCGCCTGGGCCTACAGTCGCAGCCCGACCTCGGCCTGGAGTGCCG  
GTGCTGGGTACCTCCTTAATCTTTACCCTCCACCAGCAGCAGTACCATCTAGTGGAGGATCCCTCGTTTTAGCTTCCC  
GAGCCAGCACATGAGCAGGCCAACACTGTACGCAGCTTCCACCACAATGAGCCCCCTCGGAGGCAATCCTGTAGCAGTGG  
ATCGTAAGAGGGTGCACATCTCCTTCAATGTATCCTCCATCCCTCAGGATGAGAGGGTGTCTCCTCGCTGAGCTTCGGCTT  
CTCCGAGTGACAGAGCTTACCTAGGTCCAGAGCTTCCACAGACTTAACCTTATACCTCACTAAGCACCATGAGGACCCTGA  
GCCCACCTGCTGGAGACAAGGTTACTCACCCTGGCCTCCACGGTCATAAAGAAGGCGGCTTCTGGGAGGCTTTTAGCT  
TAAATGCAGAGTTCCTCCATGAGGCCCTTAGTGGGACTGGCAGTCTGGGCTTCCTCCTAGAGGTCGGAATTGAGAACAGC  
ACCACATTGATCCCTGAACAAAACCTCTACCCTGCCGAGCTGAGGAGGAGACAGAGAAAACACAAAACAGGGACACCTGAG  
GGTATGCAGGTCTGTGGGTGAGGACGAGCATAGCTGGGCCAGGAGAGACCCCTCTTGGTGACGTACAGCCATGACGGCC  
GTGGAGAGCCCTTGGTCAAACATGGCAGGAGGAACCCCAACGGAGGCCAGAGGGTGAGAGGGGAGAAAAGGGACCAAAGAC  
AGGACCAGGGGCAGCAGCAATAGCCGAGTAGAGACCCGGCTTCGGGCAGGGCCAAAAAACAGGGTATACAGTGCAGGG  
CAGGGGGAGTGTAAAAGAGGAGTCACTGGAGCGATGCCGGAAGGGTGAAAAGAAACGGCGGTCTGTGCTGCAAACTGA  
AGCGCCTTCTCGTAACAGATGTGCGCCGATCCTCTCTATGTAGACTTCAACGATGTGGGGTGGCACAAGTGGATCATT  
GCACCAAGCGGCTACGACGCCTTCTTCTGCTTGGGCGAGTGTGCTTTCCTCTGGCCGACCACATGAACTCCTCCAGCCA  
CGCCATGGTGAAACTCTGGTGAACCTCGGTGAATGGAGCTGTGCCGCGGGCCTGCTGCGTCCCCACCTCCCTCAGTCCCA  
TCGCCCTGCTCTACCTAGACCCTCAAGACCGAGTGGTGTGAAGAACTACCAGGACATGGTGGTGGAAAGGCTGCGGCTGC  
CGGTAG

>OniBMP2 (Nile tilapia; Accession number AERX01005559)

ATGGTCGCCGTGGTCCGCTCTCTCATGGTACTGCTGCTCGCTCAGGTGTTGCTGGAAGGTGCTACGGGACTTATCCCCGA  
GGTCGGCCGGGAAATACAGCAATCCGGGAAGCAGACCCAGAGCAGTCAGAGAGCTTCTCAACGACTTTGAGCTTC  
GGCTTCTCAATGTGTTTTGGACTGGGGCAGGCCGACCCCGAGTAAGCAAGCCGTGGTGGCCGAGTATATGGTGGACCTT  
TACCGTATGCATTTCAGCAAACGGAGACCATAGCACAAACGACCCAAGAGCATGGGGAAACACGCAGAGAGAGCCGCCAG  
CAAGGCCAACAGATTAGAAGCTTTCACCATGAAGAGTCTATGGAGGCCCTGGCCAGCCTAAAAGGCCAAAACGACACAGC  
AGTTCCTACTTTAATCTCACTTCTATTCCAAATGAGGAACTCATCACCTCTGCAGAGCTACGCATTTACAGGGATCAGGTC  
ATGGGATCTGCAAGCCCCACCGAAAGCAGCATTAGTGACAGTACTCCTGCTAGTGGCCTCCATCGTATCAACATTTATGA  
GATATTTGGAGTTCCTGCCACTCAGGGCAAGGAACCTCTACTACGTCTGCTGGACACTCGAATGGTGCAGGACTCTTTGA  
GTCGCTGGGAAAGCTTTGACGTCACTCCGCTATATCTCATTGGACCTCTGGGAATGGCCACAATCACGGCTTCTTGGTG  
GAGGTGATTCACCCAGAGGAGGGGGAGATGGACAGCAAGGACGCCACAGACGCAGGAGACATGTCAGGGTGAGCCGGTC  
GCTACACCAGGACCAGGACTCGTGGCCTCAGGCTCGACCGCTGCTTGTGACATATGGCCACGACAGCCGCGGGGGCTCAG  
TGCTCCACAAACGGGAAAAAAGGCAAGCAGCACCCCGCAAACAACGTAGGAAGCACCAGCACAAGGCAAGCTGCAAGAGG  
CATGCCTTGTACGTGGACTTCAGTGATGTGGGCTGGAATGAGTGGATAGTGGCACCCCTGGCTACCATGCCTTTTATTG  
CCATGGGGAATGTCTTTCCCCCTAGCAGACCACCTCAATTCTACTAACCACGCCATTGTGCAGACACTTGTCAACTCAG  
TCAACTCCAACATCCCCAGAGCCTGTTGTGTGCCACTGACCTCAGCCCCATTTCTTTGCTCTACCTGGACGAATTTGAG  
AAAGTAATCTGAAAACTACCAAGACATGGTGGTGGAGGGATGCGGCTGCCGGTGA

>OniBMP4 (Nile tilapia; Accession numbers AB084664 AERX01008958 AB084664 and GR604846)

ATGATTCCTGGTAATCGAATGCTGATGGTCATTTTAATATGCCAAGTCCTGCTGGGAGAGAGCAACCATGCTAGTCTGAT  
ACCTGAAGAAGGAAAAAAGAAAGTACCTGGCCTGCAGGGTCGTTTCGGCCGCTCAAAGCCATGAACTGTTGCGGGACTTTG  
AGGCCACGCTGCTGCATATGTTTCGGCCTCAAAGGCGGCCGCGGCCAGTCGTTTCAGCCACTGTGCCCCGCTACCTGCTG  
GACCTTTTATCGGCTACAGTCGGGCGAGGCTGAGGAGGCGGAGCGCACGACATTGCTTTTTGAGTACCCAGAGAGGTCAGC  
CAGTCGGGCCAACACTGTGAGGGGCTTCCACCATGAAGAGCAGTGGAGCAGCTACATGAGCTGGATGACGGAGGACCCA  
TGCCCATTCGTTTTATGTTTAACCTCAGCAGCATCCAGAGGACGAGCTTCTGTCTTCCGAGAAGTGGGCTCTACCGT  
CATCAGATTGATGAGGCCATCGCTGACGCCATCTCACACGACCAGGGGCTTACCAGAATAAACGTGTACGAGGTGCTCAA  
AGCCCCCGACCTGGGCAGCTTATCACGCAGCTTCTGGATACGCGGCTAGTGCGCCACAACGCATCGCGCTGGGAGAGCT  
TCGACGTCAGCCCCGCGTGTGCGCTGGACTCGTGAGCGCTTCCCAATTACGGGCTGGCTGTGGAGGTTCTGCACCTC  
AACCAGACTCCACGTCACCAGGGCCGACACGTTTCGCATAAGCCGCTCGCTGCACCAAGAGCCCGGTGAAGACTGGGAGCA  
GCTACGCCCCCTCCTGGTAACCTTTGGTACGACGGAAGGGTACCCTGACTCGCCGGACCAAGCGCAGCCCGAGAC  
AGCGGGGCGGTAAACGCAACCGCAACTGCCGGCGCCATGCGCTGTACGTGGACTTCAGCGATGTAGGCTGGAATGACTGG  
ATAGTGGCGCCTCCTGGTTACCAGGCCTATTACTGCCACGGGGAATGCCCTTTCTCTGGCAGATCATCTGAATTTAAC  
CAACCACGCCATTGTTTCAGACACTGGTGAACCTCTGTGAACAACAATATTTCCCAAGGCCTGCTGTGTGCCAACAGAGCTCA  
GCGCCATCTCCATGCTCTACCTAGATGAACACGACAAGGTGGTCTAAAAAACTACCAGGAAATGGTAGTGGAGGGCTGC  
GGCTGCCGCTAA

>OniBMP16 (Nile tilapia; Accession number AERX01025009)

ATGTTCCCTCCTAACCTCCTGCTCCTCATGGTCCTGCTGCTACCTCATGGCTCGTCTGGTCGCCAGGGTGGAGACACCAG  
CGAGATCGATCATGGCAGGGTGCACCCACACCTTCCGCTTTGTACCCTCACTCCGGGATCCCGGTCTGGCTCAGACCA  
TCCAGAGTCTCCTTTTGGAGCCGACTGGGGCTGCAGTCTCAGCCTGACCCAAGGCCTGGAGTGCCGGTGCCACGGTACCTC  
CTGGATCTTTACCCTTCCACCAGCAGCAGTACCATCTAGTAGAGGACCCCTTCATTTAGTTTTCCCAGTCAGCACATCCA  
GGAGGCCAACACTATACGCAGCTTCCACCACAATGAGCCCCCTGGAGACAGTCTTGGTGCAGAGGATCATAACCAGAGTGC  
ACATTTCTTCAATATCTCTTCCATCCCTCAAGATGAGAGTGTGCTCTCTGCTGAGCTCCGCCTCCGTGCGAGTGACGGA



GCATCTCTGGGTCTGGACCCACAGACTAAACCTATACCTCTCTGAGCACCATGAGGACCCTGAGCCCACTCTGCTGGA  
AACAAAGTTACTCACCAATGGCCTCCGTAGTTATAAAACAAGTGGTTTTCTGGGAGGCTTTTAGTCTTAGCGCAGAACTCC  
TACATGAGGCCCATGCTGGGACTGGCAGCCTAGGATTCTCTCTGGAGGTGACACCTGAAAACACCACCTCACTTCTGAG  
CAGAACCTCTCTTCTGCTGCAAGTGAGGGGACGGAGAAATCAAAAGAGGCACACCTGAGGGTGTGCAGATCTGTGGGACA  
AGACGATCACAGCTGGGCCAAGAGAGACCCCTCTTGGTTACTTACAGTCATGATGGTCGTGGACAGCCTTTAGTCAAAC  
ATGGTAGAAGAAACCTGGTAAATGGCCAGAGGAAAAGGAGCAAAAGGCAAGGGTCAAGAATAAAAACAAGGAATCTCAAT  
AGAAACCAATCTGGGGGAGGACAAAAGAATGGGGTATACTGTGACCCAGCTGGGCGGATGACAAAAGGAAATCAGTTG  
GAGCGAACGTGGCAGGGTAAAAGAAACGGTGGTCGTTCTGCAAACTGAAACGCCTTTCCCGCAATAGATGCCGCCGCC  
ATCCACTTTTATGTAGATTTCAATGACGTGGGCTGGGAAAAGTGGATCATTGCACCCAGTGGCTACGACGCCTTTCTTCTGC  
CTGGGTGAGTGTGCTTTCTTTGGCTGACCACATGAACTCTCAAGCCACGCCATGGTGCAAACCTCTGGTAAACTCTGT  
GAATGGAGCAGTGCCCCGGGCTGCTGCGTCCCAACCTCTCTCAGTCCCATCGCCCTGCTCTACCTGGACTCTCAAGACC  
GAGTTGTGCTGAAAAATTATCAGGACATGGTTGTGGAGGGCTGCGGCTGTGCGTAG

>OlaBMP2 (Japanese medaka; Accession numbers BAAF04048581, DQ915174, AM340447, DK232580, DK251511, AM380364, DE095303, DH343454, DE100795, DE077111 and BAAE01085765)

ATGGTCGCCGTGGTCCGCTGTCTCATGGTACTGCTGCTCGCTCAGGTGTGCTGGAAGGAGCTGCGGGACTCATCCCCGA  
GGTCCGCCGAAGGAGGTACAGCGAGTCAGGGAGGCAGAGCGCAGGGCAGTCGGACAGCTTCTCCACGAGTTCGAGCTTC  
GGCTTCTCAACATGTTCCGGGCTGGGGCGCAGGCCACCCCCAGCAAGCAGGCTGTGGTGCCGAGTACATGCTGGACCTT  
TACCACATGCACTCTGCGCACGGGGAGCACAGCGCCAGGCGTCCCAGGAGCATGGGAAAACACGCGGAGAGAGCCGCCAG  
CAGGGCCAACACGATTAGAAGCTTTCACCATGAAGAAGCGATGGAGGCCCTGGCCAGTCTGAAGGGCAAAAACAACCCAGC  
AGTTCTACTTTAACCTCACCTCCGTTCCCGAGAAGGAGCTCATCACCTCTGCAGAGCTGCGCATTACAGGGATCAGGTG  
AAAGGGGCGCAAACAGCAGCAACAGCAGCAGCCTGGTGGCCTTGGCGTCCACCGCATCAACATTTATGAGATGTTTGG  
ACTTCTGCTTCAAAGGGCAGACCCTCTGGTGCCTGCTGGACACCCGCTGGTGCAGGACTCTTTAAGCCGCTGGG  
AAAGCTTCGAGTCAGCCCCGCGTGTCCAAGTGGACCTCGGGGAAAGGCCACAACCACGGCTTCATGGTGGAGGTGCTT  
CACCCAGGAGAAGGGGACGGTGAGCACGGGCAAAGACAAAAAAGGCACGTGAGGGTGAGCCGGTCTTGCACCAGGACCA  
GGACTCGTGGCCTCAGGTGCGGCCGTTGTTGGTGACGTACGGTACGACGGCCGCGGGGACTCTGTGCTCCATAACAAGGG  
AAAAAAGGCAAGCATCCCTCCGCAAGCAGCGCAGGAAAAACCATCACAAGCCAGCTGCAAGAGGCACGTTTTGTATGTG  
GATTTACGCGATGTGGGATGGAACGAGTGGATAGTGGCACCCTGGCTACGATGCCTTTTATTGCCACGGGGAATGCC  
CTTCCCCTTACCAGACCACCTCAATGCAACCAATCATGCCGTAGTGCAGACTCTTGTCAACTCGGTCAACTCGAACATCC  
CCAAAGCCTGCTGTGTGCCACTGAACTCAGCCCCATCTCCCTGCTCTACCTGGATGAGTTCGAGAAAGTGAATCTGAAA  
AACTACCAGGACATGGTGGTGGACGGCTGCGGCTGCCGGTGA

>OlaBMP4 (Japanese medaka; Accession numbers DK004345, AM140778, AM139646, DC268248, AM299276, AM339195, DQ915175, DK197479, BJ014414, DC244878, DC276748, AM384609, DC253831 and AV669968)

ATGATTCCTGGTAATCGAATGCTGATGGTCATTTAATATCCCAAGTCCTGCTGGGAGAGAGCAACCATGCTAGTCTGAT  
ACCCGAAGAAGGGAAAAAGAAAGTACCTGGCCTGCAGGGTCGCTCGACCGCTCAGAGCCATGAACTTTTACGGGACTTTG  
AGGCCACACTGTTGCACATGTTTGGCCTCAAAAAGCGCCCGCTCCAAGCAAAGCTGCCGCCGCTGCCTCGTTACCTGCTG  
GATCTCTATCGACTGCAGTCAGGGGAGGCTGAAGACGTAGAGGCACACGAAATTCCTTTTGGATATCCCGAGAAGTACG  
CAGCCGAGCCAAACCCGTCAGGGGCTTCCACCATGAAGACACATGGAGAGGATACACGAAGTGGATGATGCAGATCCA  
TCCGCTTTCGCTTCCGTTCAACCTTAGTAGCATTCCAGAGGACGAGCTGCTGTCTTCCGAGAGCTGCGACTCTACCGT  
CAGCAGCTGGGCGAGGCCAACGATGATAGCCCCCTAAACGACCAGGGCCTTCATCGGATAAACATATACGAGGTGCTTAA  
ACCCCGCGGGCCCGGCGAGCTTATCACGCAGCTTCTGGACACCCGGCTTGTGCGCCACAACGCTTTCGCTTGGGAGAGCT  
TTGACGTCAGCCCCGCTGTGCTACGTTGGACTCGGGAACGGCTCCCTAATTATGGACTGGCTGTGGAGATTCTCCACCTT  
AATCAGACTCCACACAACCAGCACCAGCATGTCCGCATCAGCCGTTCTTACACCAGGAGCCAGGAGAGGACTGGGACCA  
GGTACGCCCTCTTCTGGTTACCTTTGGCCACGATGGAAAGGGTCACTCATTGACACGCCGGACAAAACGCAGCCCCAAC  
CACGAGGGCGTAAACGAAACCGCAACTGCCGGCGCCATACTCTGTATGTGGACTTTAGCGATGTAGGCTGGAATGACTGG  
ATAGTGGCACCTCTGGTTACCAGGCCTATTACTGCCACGGAGAGTGCCTTTTCCGCTGGCAGATCATCTGAACTCAAC  
TAACCACGCCATCGTGCAGACACTGGTGAATCTGTGAACAACAACATTTCCAAAGGCCTGCTGCGTACCAACAGAGCTCA  
GCGCCATCTCAATGCTATACCTAGACGAATATGACAAGGTGGTCTAAAAAACTACCAGGAAATGGTAGTGAAGGCTGC  
GGCTGCCGCTGA

>OlaBMP16 (Japanese medaka; Accession numbers BAAE01034973, BAAF04019993, BAAF04019995, BAAE01034974, BAAE01219338, AM318552, DK098052, DH423513)

ATGCTCCCTGCTAACATCCTGCTTCTCATGTTCTTGCTGCTACCTCAAGTCTCGTCTGGTCGCCAGGGTGAAGACACCAG  
CGAGATTGACCATGGCAGGGTCCGCTCCACGTCTTCATCTCGACACCCACCCATCGATGGCGGATTTCAACCTTTCTC  
AAACCATTCAGAATCTTCTTGGAGCCGACTGGGCTGCAGTCTCAGCCCTAACCTCAGTCTGGGATACCAGTCCCACAG  
TACTCTTGTATCTGTACCGCTTCCACAAAAGCAGTACCATCTAGTGAAGAGCCCATCATTTAGCTTCCCAGCCAGCA  
CATTCAACAGGCCAACACAGTACGCAGTTTTTCATCACCGCAGTCCCATGAAGACAGTCACACAGAGAAGGATCATACTA  
GAGTACACATCTCATTTGACATCTCGTCCATCCCTCAAGAGGAGAGGGTGTCTCTCAGCCGAGCTTTCGCTGCTGCGCAGC  
GACAAAGCTTCCCTGGGCTCCTGGATCACACAGACTGAACTATACTCTCAAAGCATCGCAGAGATCCTAAGCAGGCTTT  
GCTGGAGACAAGGTTACTCGCCAACAACCTTCATAGCAATAAAACCAAGTGGTTTTCTGGGAAGCATTTACCATAAGTGCAG  
AGCTTCTGCAAAAAATCCAAGCTGGTACTGGCAGCCTGGGCTTCTTCTTGAATCAAACCTGAAAATACTACCAACCCA

CTTCCTTACCAGATGTTTGCCTCTGCATCATATGAAGACAAGTCAGATGGACAAAAAGAGAGACACCTGAGAGTGTGCAG  
GTCTGTGGGCCAAGATGATCACAGCTGGGCCAGGGAAAGACCCCTGCTGGTGACCTACAGTCATGATGGCCGAGGAGAGC  
CTTTGATTAACATAGCAGGAAAACCTCTGGTAACAGTCAGAGGATTAGGGGGAAAAAGGGGTCAAAGGTGAGGGCCAGA  
AACAGCAGTAAAGGTCACGATACAGCTAAAGCCTGGGGTAGGGCCAAAAAAGGGGTATTCTGTGCAGGACTGGGCGAC  
TAAACAGGAGGGGTGAGTGGAGCGAACGAGGAAGGGTAAAAAGAAATGGTGGGCACTCCGCAAAATTAAGCGTATTT  
CGCGTGGCAGATGCCGCCCTCATCCTCTACATGTAGATTTTAGAGATGTGGGTTGGCAAAGTGGATCATTGCGCCAGT  
GGCTATGACGCCTTCTTCTGCCTGGGAGAGTGGCGTTATCCCCTGGTGCAGACACATGAACGCCTCGAGCCATGCTGTGGT  
TCAAACCATGGTAAACTCTGTGAACGGAGCAGTGCCCCGTCCTGCTGCGTCCCCACCAGCCTCAGCCCCATTGCGCTGC  
TTTACATGGACTCTCAAGATCGAGTTGTGCTGAAAAATTACCAGGACATGGTGGTGGAGGGATGTGGCTGCCTGTAG

>SsaBMP2 (Atlantic salmon; Accession numbers BT059611, CA061573, GE795400, GE795401, EG901180, EG901179 and CX353173)

ATGGTCGCCGTGTTTTCGTTCTCTCATGGTACTGCTGCTGGCTCAGGTGTTGCTGGGAGGGCGCTGCGGGACTAATCCCCGA  
GGTTGGCCGGAGGAAGTACAGTGAGTCCGAGAAGCAGAGCCCCGAGCAGTCGGATAACTTTTCTCAACGAGTTCGAGCTGC  
GGCTCCTCAATATGTTTCGGACTTAAGCGGAGGCCGAACCCGAGCAGACAGGCTGTGGTGCCTCAGTACATGGTGGACCTG  
TACCGTATGCATTGCTTGAACGGAGACCACAGCACTAAACGGCCCCGGAGCATGGGGAGGCACGCAGAGAGAGCCGCCAG  
CAAGGCCAACACGATTAGAAGCTTTCACCATGAAGAGTCCATGGAGGCTCTGGCCAGTCTGAAGGGCAGGACAACCCAGC  
AGTTCTTCTTCAACCTCACCTCCATCCCTGGAGAAGAGCTTATCACCTCTGCAGAGCTCCGGGTATACAGGGACCAGGTC  
CTGGGGGCCACAGCAGCTCCCACCAGTAACACCAGTCACAACAGCAGTAACAGCTCCAGTACCAGTGTGGTGGCTTCCA  
TCGTATCAACGTGTATGAGGTGTTTGGAGCCCCCTGCGTCTCCCCGTGGGGAACCCCTGACACGCCTCTTGGACACGCGGC  
TGGTGCAGGACTCTCTGAGCCGCTGGGAGAGCTTTGACGTCAGCCCCGCGTGTACAGTGGGCCTCCGGGGGGCGCCAC  
AACCACGGCTTCCCTGGTTGAGATGCTCCACCCAGACACCCTGGGGGGCGAAGAGGGCCAAAGACAGAGACGACACGTCAG  
GGTAAGCCGCTCCCTCCACGGGGACCAGAATCATGGCCCCAGGCTCGCCCCCTGCTGGTGCACCTACGGTTCATGACAGAC  
AGGGGAATCGCGTGTGCACAGGACAAAGAGACAGGAGCAGCAGGACACAGGAACAGAGGAAGAAGACCAACACAAGGCC  
AAGTCCCGCAGACATCCCTCTACGTGGACTTCAGCGCAGTGGGCTGGAATGAGTGGATAGTTGCACCCCCCTGGCTACCA  
CGCCTTCTACTGCCACGGGAGTGCCCCCTCCCATTTGGCCGACCACCTCAACTCCACCAACCACGCCATCGTTTCAGACGC  
TGGTCAACTCTGTGAACTCCAACATCCCCCGGGCGTGTGCGTGCACAGAGCTTAGCCCCATATCACTGCTCTATCTG  
GATGAGTATGAGAAGGTCATCCTCAAAAACCTACCAGGATATGGTGGTGGAGGGATGTGGCTGCCGGTGA

>SsaBMP4a (Atlantic salmon; Accession numbers NM\_001139844 DY702674, CX355133, GE769237, CA040511, DW541811, DW551593, CK893345, CB500013, GE769238, CA055499 and DW551594)

ATGATTCCTGGTAATCGAATGCTGATGGTCATTTTTATTATGCCAAGTCCTGCTGGGAGAGAGCAACCATGCTAGTCTGAT  
ACCTGAGGAAGGGAAGAAGAAAGCCCCGGGCCTGCAGAGTCGGACGGCTGGTCAGAGCCATGAAGTCTGCGGGACTTTG  
AGGCCACGCTGCTGCACATGTTTGGGCTGCAGAGGGCACCAGCGGCCAGCCGCTCGGCCACCGTGCACGCTACCTACTG  
GACCTCTACCGACTGCAGTCGGGTGAGGCCGAGGAGGCCGGTGCCTATGACGCCGCCTTTGAGTACCCCGAGAGGTTCGGC  
TAGCCGCGCCAACACCGTGAGGGGCTTCCACCACGAAGAGCACATGGAGCGGGTTTCATCTGGGCGATCTTCAGACGAAGA  
ATGGCGAGGCCCGCCCCGCTGCGCTTCCCTCTCAATCTCAGCAGCATCCCAGAGGACGAGCTGCTCTCGTCGGCCGAGCTG  
CGTCTGTTCCGGCAGGAGATCGACGAGGCCATTTCCGGGAGCGGGGGGACAAGGAGGGGCTCCACCGGATAAACGTGTA  
CGAGTTCTGAAGCCCCCGGGCCGGGCAGCTAATCACGCGGCTCTTGGACACGCGACTGGTTTCGGCATAACGCCTCGC  
GCTGGGAGAGCTTCGAGCTGAGCCCCGCGTGTGCTGGACACGGGAGCGCTTGCCCAACCTCGGGCTCGCTGTGGAG  
GTCTGACACCTCAACCAGACACCGCGCCACCAGGGCCGCCACGTCGTCATCAGCCGCTCACTGCACCAGGAACCTGGGGA  
GGACTGGGAGCAGCTACGCCCCCTGCTGGTACCTTCGGCCACGACGGCAAGGGCCACCCGTTGACGCGCCGGGCCAAGC  
GCAGCCCAAAGCAGCGGGGGCGTAAGCGCAACCGCAACTGCCCGCTCACGCGCTGTATGTGGACTTCAGTGTATGTGGGC  
TGGAATGACTGGATAGTGGCGCCCCAGGGTACCAGGCATACTACTGCCATGGGGAGTGGCCCTTCCCTCTGGCAGACCA  
CCTGAACTCTACCAACCACGCCATCGTGCAGACGTTGGTGAACCGGTGAACACCAACATTCCCAAGGCCTGCTGCGTGC  
CCACGGAGCTCAGTGCCATCTCCATGCTCTACCTGGATGAACACGACAAGGTAGTCTCAAAAACTACCAGGAAATGGTA  
GTGGAAGGGTGGCGTTGCCGCTAA

>SsaBMP4b (Atlantic salmon; Accession numbers CX354839, DW573815, DW573814, CA056395, FJ195610)

ATGATTCCTGGTAATCGAATGCTGATGGTCATTTTTATTATGCCAAGTCCTGCTGGGAGAGAGCAACCATGCTAGTCTGAT  
ACCTGAGGAAGGGAAGAAGAAAGCACCGGGCCTGCAGAGCCGACTGCTGGTCAGAGCCATGAAGTCTGCGGGACTTTG  
AGGCCACGCTGCTACACATGTTTGGACTGCAGAGGGCACCAGCGGCCAGTCGCTCGGCCACTGTGCCACGGTACCTGCTG  
GACCTCTACCGGCTGCAGTCGGGCGAGGCTGAGGAGGCCGGCACCCACGACACCGCCTTTGAGTACCCCGAGAGGTTCGGC  
TAGCCGCGCCAACACCGTGAGGGGCTTCCACCACGAAGAGCACATGGAGCCGGTTTCATCCGGGCGAGTCTCAGACGAAGA  
ACGGAGAGGCCATCCCCTGCGCTTCCCTCTCAATCTCAGCAACATCCCAGAGGACGAGCTGCTCTCGTCGGCCGAGCTG  
CGTCTGTTCCGGCAGCAGATCGACGAGGCCATTACGGAACGAGGGGACAGGATCAGCTCCACCGGATAAACCGTGTGTA  
CGAGTTCTGAAGCCCCCGGGCCGGGCAGCTAATCACGCGGCTTTTGGACACACGGCTGGTGCACCATAACCCCTCGC  
GCTGGGAGAGCTTTGACGTGAGCCCCGCGTGTGCGTGGACACGGGAGCGCCTGCCCAACTACGGGCTGGCCGTGGAG  
GTCCAGCACCTCAACCAGACACCACGCCACCAGGGCCGCCACCTGCGCATCAGCCGCTCGCTGCACCAGGAGCCCGGGGA  
GGACTGGGAGCAGCTACGCCCCCTGCTGGTACCTTCGGCCATGACGGCAAGGGCCACCCGTTGACGCGTGGACCAAGC  
GCAGCCCAAAGCAGCGGGGGCGTAAGCGCAACCGCAACTGTGCGCGTATGCTCTCTACGTGGACTTCAGCGATGTAGGC  
TGGAATGACTGGATAGTGGCGCCCCAGGGTACCAGGCATACTACTGCCATGGGGAATGTCCCTTCCCCCTGGCAGACCA

CCTGAACTCTACCAACCACGCCATTGTTTCAGACGTTGGTGAACACCAACATTCCCAAGGCCTGCTGCGTGC  
CCACGGAGCTCAGTGCCATCTCCATGCTCTACCTGGACGAACACGACAAGGTGGTCTAAAAAACTACCAGGAAATGGTT  
GTGGAAGGGTGTGGCTGCCGCTAA

>SsaBMP16 (Atlantic salmon; Accession numbers AGKD01064384, CK879241, CK879040)  
ATGTTCCCTGCTAAACTCTTGGTCCTGATGGTCCTACTGCTACCTCAAGCTTCGTCTGGTCGCCAGGGCTTTGCCACCGA  
GCCCCGATGGCAGTGTGCCGTCGTTGTCACCGTTATCACCCACCCCCCTGGAGCCCAGCCTGGCCCAGACAATCCAGAACC  
TGTTCGCTGAGCCGCTGGGCCTGCAGTCCCACCCCAACCCCCGGCCAGGTGCGCCCATCCCCAGTACATACTGGACCTC  
TATCGCTTCCACTCCCAGCAGTACCACCTAGTCCAGGATCCACACTTCAGCTACCCCAGCCAGCATGTCCAGGAGGCCAA  
CACCGTACGCAGCTTCCACCACACAGAGTCTACCAGCCCCAACTCCCCCTTGAAAAGAGGCTGACCACCGTGAGCAACA  
ACAAGGTCCCCATCTCCTTCAACGTGTCTCCATCCCCCAGGATGAGTGTGTGGTTTCTGCCGAGCTGCGTTTCTTCCGA  
GGTGGTGGGGCTAGCCTAGGCCCGGGCGCCACAAGGTGAGCCTGTTTCTCGATGGAGGCACTGGGGACTCTGAGTCTGA  
GCCACTCTGCTGGAGTACGGCTCCTCACAGGGGCCCCAGCCTAAGCCAGCTGGCTCCTGGGAGGCCCTTACGCTCA  
GACTGAACTCTTCGTAGGGGCCACGCTCAGACCGGCAGCCTGGCCTTCTCCTTGAGGTGACCCCTCTGGGTAACACC  
ACCCTCCTACCCCCCTGACCATGATGCTCTACCCTCTCCACTGGGGAGGAAGGGCGCAGAGAGGGACACCTGAGGGT  
GCGCAGGTCTCTGGGACAGGACGAGCACAGCTGGGCACGGGAGAGACCCCTGCTGGTTACTTACAGCCATGACGGGCACG  
GGGAGCCACTAGCCGCCATGGCCGGAGAACCCTTGACACCGCCAGAGGATGAGGGGGAGGAAGCGGGCCAGAGAAAGG  
GGCAGGAGCAACAGCAGGGACCGGGAAAGGGACAGAGACAAGGACAGGGACTGGAGCGCCAGCCCTGGCTGGGGCGGCAG  
CTGGAACGAGGGTGAAGGGTGAAGCGCAATGGTGGCCGGGCAGCGAACTGAATCGTCTGTCCCGCGCCCGCTGCCGCC  
GCCACCCGCTCTACGTGGACTTCAAAGACGTGGGCTGGAACAAGTGGATCGTGGCGCCTAGTGGCTACGACGCTTCTTC  
TGCTGGGGGAGTGGCGCTTCCCACTCACCCACCACATGAACTCATCCAGCCACGCCATGGTGCAGACGCTGGTGAACCTC  
GGTGAACGGAGCTGTGCCGCGGGTCTGCTGCGTACCCACCGCTCTCAGCCCCATCGCCATGCTCTACCTGGACCCGAGG  
ACCGCTGGTGTCTAAAAACTACCAGGACATGGTGGTGGAGGGCTGTGGATGCCGGTAA

>TniBMP2 (Spotted green pufferfish; Accession number AC141355)  
ATGGTCGCCGTGGTCCGCTCTCTCATGGTACTGCTGCTCGCTCAGGTGTTGTTGGAAGGTGCTACTGGACTTATCCCTGA  
GGTCGGCCGGAGGAGATACAGCGAATCTGGGAAGCAGAGCCCACAGCAGTCAAGAGGGCTTCTCAACGAGTTTGGAGCTTC  
GGCTTCTCAATATGTTCCGACTGAAGCGGAGGCCACCCCGAGCAAGCAGGCTGTGGTGGCCGAGTACATGGTGGACCTT  
TACCGCATGCACTCGGCGAACGGAGATCACAGCGCTAAACGACCCAAAGAGCATGGGGAGACATGCAGAGAGAGCCGCCAG  
CAAGGCCAACACGATTAGAAGCTTTCACCATGAAGAGTCGATGGAGGCACTGGCCAGGCTCAAAGGCCAAAACAACCTCAAC  
AGTTCATTTTTAATCTCACATCCATACCTAAAGAAGAGCTCATCACCTCTGCAGAGCTCCGTATCTACAGGGATCAAGTC  
ATGGGAGCTGCATCCACCAACAACAGCTCTACCAACAGCAGCACCAGTGATAAGGCTCATGCTGGTGGCTTCCATCGCAT  
CAACATCTACGAGATATTCGGAGTTCTCAAGGCAGGGAACCTCTGGCACGTCTGTTGGACACTAGGCTTGTTCAGGACT  
CTCTGACCCGGTGGGAGAGCTTCGATGTGAGCTCTGCTGTATTTAGTGGACCTCTGGGAAAGGCCACAATCACGGCTTT  
ATGATAGAAGTGCTTCATCCAGAGGAGGGCGAGGTAGAACAGGAGCGAGCCGACAAACATAGCAGACATGTGAGAGTGAG  
CCGGTCTTGCATCAGGACCGGGACTCATGGCCTCAGGCCCGGCCTTTGCTAGTAACGTACGGCCACGACGGCCCGGGG  
ACTCGGTGCTCCACACCAGGGAAAAACGTGAGGCAGCACTCCGCAAACAGCGCAGGAAACACCAACACAAGGCCAGCTGC  
AAAAGGCATGCCCTGTATGTAGACTTTAGTACGTTGGGTGGAACGAGTGGATTGTGGCACCCCTGGCTACCATGCCTT  
TTATTGCCAGGGAGAATGTCCATTCCTCCCTGGCAGACCCTCAACTCTACCAATCATGCCATTGTGCAAACACTGGTCA  
ATTCAGTCAACTCGAATATTCCTCCGAGCTTGTGCGTGGCCACTGACCTCAGCCCCATCTCCTTACTCTACCTGGATGAA  
TATGAAAAGTCACTCTAAAAACTACCAAGACATGGTGGTGGAGGGATGTGGCTGCCGGTGA

>TniBMP4 (Spotted green pufferfish; Accession number CAAE01015019, AC141355 and  
AL292165)  
ATGATTCCTGGTAATCGAATGCTGATGGTTATTTTTAATATGCCAAGTCCTGCTGGGAGAGAACAACCATGCAAGTCTGAT  
ACCTGAAGAAGGGAAAAAGAAAGTACTGGGCCTGCAGGGTCGTTCCGCCACTCAGAGCCATGAACTTCTACGGGACTTCG  
AGGCCACGCTGCTGCACATGTTCCGGCCTCAAGAGGCGGCCGAGGCCAGCCGCTCGACCGCCGTCCCCAATACTGCTG  
GACCTCTACCGGCTGCAGTCCGGCGAGGCTGAGGAGGCTGGAGGGCAGGATATCGCATTTGAGTACCCGGAGAGGGCAGC  
CAGCCGGGCCAACACTGTGAGGGGCTTCCATCATGAAGAGCACATGGAGATGATTTACGCGCCGGATGATGGCGAATTGA  
CGCCCTTCGATTCTTGTTCACCTTAGCAGCATTCCAGAGGACGAGCTGCTGTCTCCGCCGAACCTGCGGCTCTACCGC  
CATCAGGTTAATGAGGACAACGTCACGCTCTCGGCAGACCACGGGCTCCATCGGATAAACGTGTATGAGGTGCTCAAGCC  
CCCTAGGCAAGGGCAGCTAATCACGCAGCTCCTGGATACGCGGCTCGTCCGCCACAACGCGTCACGCTGGGAGAGCTTCG  
ATGTGAGCCCTGCTGTGCTACGCTGGACTCGTGAAGGCCAGCCCAATTATGGATTGGCCATAGAGGTTCTGCACCTCAAC  
CAAACACCGCGCCACCAGGGCCGACATGTCCGAGTACAGCCGCTTTTACACCAAGAGCCTGGGGAGGACTGGGAGCAGCT  
ACGCCCGCTCCTGGTACCTTTGGTACGACGGGAAAGGTACCCGCTCACCCGGCGTTCCAAGCGGAGCCCCAAGCAGC  
GAGGACGTAACGCAACCGCAGCTGCCGGCGCCACTCGCTGTACGTGGACTTTAGCGACGTGGGCTGGAATGACTGGATA  
GTGGCGCCCCCTGGTTACCAGGCCTACTACTGCCATGGGGATTGTCCGTTCCCCCTGGCGGATCATCTGAACTCGACCAA  
CCACGCCATTGTTTCAGACACTGGTGAATTCCTGTAACAGCAACATTCCTCAAGGCCTGCTGCGTGGCCACCGAGCTCAGTG  
CCATTTCCATGCTCTACCTAGATGAACACGACAAGGTGGTCTAAAAAACTACCAGGAAATGGTGGTGGAGGGCTGCGGC  
TGTCGCTAG

>TniBMP16 (Spotted green pufferfish; Accession number CAAE01014537.1 and AL336493)  
ATGCTCCCTGCTAACCTCCTGCTCCTCATGGTCCTGCTGCTACCTCAAGTCTCGTCTGGTCGCCAGGGTGGAGACGCCAG  
CCAGACTGACCATGGCAGAGTGCCCCCGTGGCCTCGTCCCTTCTGAGCCACCAGCCGCTCCCAGCCTGAAGCCCAGCC

TGGCCGAGACTATCCAGAGTCTCCTCCTGAGTCGCCTGGGCCTGCAGTCGCAGCCGGACCCTCGGCCTGGAGTCCCCGGTG  
CCTCGGTACCTCCTGGATCTGTACAGATTCCATCAGCAGCAGTACCACCTAGTGGAGGACCCTTCATTTCAGCTTCCCCAG  
GCAGCACATCCAGCAGGCTAACACCGTTTCGCAGCTTTCACCACAATGAACTTTCTGATGACAATTCCCTACCTGATAATC  
CTCAGAGGGTGCACATCTCCTTCAATATCTCCTCCATCCCTGAAGACGAGAGGGTGTCTCTCCGCCGAGCTTCGACTCCTC  
CGAAGCAGCAGAGCCTTTTGGGGCCCTGGGGTCCACAGATTGAACATTTACCTTGTGGAGAGTATGGAGACCCTGAGCC  
CACCTGCTGGAGACACGATTATTCACCAGTCTAATAATACTCATGAATCAAGTAGTCTCTGGGAGGCCTTTCTCTAA  
CCTCAGACATTCTCCTTGAAGTCTTGGTGGGACTGGCACCCTGGGCTTCTGCTGGAGGTCAGACCTGAGAACAGAACC  
TCCTCAGGCGTCCAGCAGAACGTCTATGCTGCAGCAGGTAAAGAGGATGCTGAGAAAAGAGGGACACCTGAGGGTCCGTAG  
GTCCGTGGGTGAGGATGAGTACAGTTGGACCCAGGAGAGACCTCTCTTGGTGACCTATAGCCATGATGGGCGCGGAGAAC  
CTTTAGCCAACCATGGCAGGAGGACCCCCGCTGGCGCCAGAGGATCAGAGGGGAGAAAAAGACCAAAGACAGAGAAGCC  
AGGAGCAGCAAGAAAAGCCGCGCTAGCGATCCAAACAGTAGGAAGGACAAAACAGGATATTCTGTGCCAGGATGGGGTTCG  
TGATAAAGGAGGGGTGGTTTGAAGGAGAACCGAAGGGTGAAGAAGAAACAACGGCCGTGCCGCAAACTAAAACGCCTTT  
CCCGTAACAGATGTCGCCGGCATCCCCTGTACGTAGATTTCAATGACGTAGGCTGGCACAAGTGGATCATTGCCCCAGC  
GGCTACGATGCCTTCTTCTGCCTGGGAGAGTGCCTTTCCCCTGGCTGACCACATGAACTCCTCCAGCCACGCCATGGT  
ACAACTCTGGTCAACTCTGTGAACAGAGCCGTTCCGCGGGCTTGTGCGTCCCCACCTCCCTCAGCCCCATCGCCCTGC  
TCTACCTGGACCCGCAAGACAGAGTCTGCTGAAGAACTACCAGGACATGGTGGTGGAGGGATGTGGCTGCCGGTAG

>XmaBMP2 (Southern platyfish; Acession number AGAJ01019336)

ATGGTTCGCCGTGGTCCGCTCTCTCATGGTACTGCTGCTCGCTCAGGTGTTGCTGGAAGGTGCTGCGGGACTCATCCCCGA  
GGTCCGCCGGGAGGAAGTACAGCGAATCTGGGAAGCAGAGCCCCGAGCGGTTCGGAGAGCTTCTCAACGAGTTCGAGCTTC  
GGCTTCTCAACATGTTCCGGTGGGGCGCAGACCCACCCCCAGCAAGCACGCCGTGGTGCCACAATACATGGTGGACCTT  
TACCACATGCACCTGCAAACGGAGACCACAGCACTAAACGACCCAAGAGCATGGGCAAGCACGCAGAGAGGGCCGCCAG  
CAAGGCCAACACGATTAGAAGCTTTCACCATGAAGAATCAATGGAGGCATGGCCAGCTGAAAAGCAAAAACAACCCAGC  
AATTCTACTTCAACCTCAGTCTATCCCTAAAGAGGAGCTATAACCTCTGCAGAGCTCCGCATTTACAGGGATCAGGTC  
ATCGGAGCGGCACCTCCTAAGAACAGCAGCTCTACTAGTGGTCTCTTGTGAGGAGCCTCCATCGTATCAACATCTACGA  
GATCTTCAGAGTACCAATAGGCACAGAACCTCTGGTCCGTCTGCTAGACACCAGGCTGGTTCAGGACTCTTTGAGCCGCT  
GGGAGAGTTTTGACGTGAGTCTGCTGTATCTGAATGGACTTCGGGGAATGGCCGAATCATGGCTTCATGGTGGAGGTG  
CTTCATCCAGAGCAGACAGAGAAGGCTGCAGAGCATTCCCAGAGAAGAAAACAGGCACGTCAGGGTGAGCCGGTCCCTGCA  
CCAGGACCAGGACTCATGGCCTCAGGCTCGGCCCTGCTGGTAACATATGGTACGACGGTCTGGGGACTCAGTACTCC  
ATACACGGGGGAAAAGGCAGGCAGCAGTCCGGAAACAACGCAGGAAGCATCAGCAAAAGGCAAGCTGCAAAAGGCATAACC  
TTGTACGTAGATTTTCAGCGACGTGCAATGGAACGAGTGGATAGTGGCACCCCCAGGCTACCATGCCTACTACTGCCATGG  
GGAATGCCCTTTCCATTACCAGACCACCTTAATGCAACTAATCATGCCATTGTGCAGACACTTGTCAACTCAGTAAACT  
CAAACATCCCCAGAGCCTGTTGTGTGCCACCGAACTCAGCCCCATTTCTGTTGCTCTACTTGGACGAATATGAGAAGGTG  
ATTCTGAAAACCTACCAGGATATGGTGGTGGAGGGCTGTGGCTGCAGATGA

>XmaBMP4 (Southern platyfish; Acession number AGAJ01041398)

ATGATTCCTGGTAATCGAATGCTGATGGTCATTTTATTATGCCAAGTCCTGCTGGGAGAGAGCAACCATGCCAGTCTGAT  
ACCTGAAGAAGGGAAGAAGAAAGTGCCTGGCCTGCAGGGTCGTTCCGGCTGCTCAGAGCCATGAACTGTTGCGGGACTTTG  
AGGCCACGCTGCTGCACATGTTCCGGCTCAGGAGGCGGCCGCGGCCAGTTCGCTCCGTCACCGTGCCCCGCTACCTGTTG  
GACCTCTATCGGCTGCAGTCCGGGGAGGCCGAAGAGGCCGAGCGTACGACATCGACTTTGAGTATCCCCGAGAGTCCGC  
CAGCCGGGCCAACACTGTGAGGGCCTTCCACCATGAAGAGCACATGGAGAGGATCCATGAGCTGGGTGATGGAGAATCCA  
TGCTCTCCGCTTCTGTTCAACCTCAGCAGCATTCCAGAGGACGAGCTGCTTTCTCTGCAGAGCTAAGACTCTACCGT  
AGTCAGATTGATGAGGCCACCGCTGACGACCAGAGTCTGCACCGCATAAACATCTACGAGGTCCTGAAGCCCCCGCGGCC  
CGGGCAGCTCATCACCAGCTTCTGGACACACGCCTCGTTCCGGCACAACGCGTCACGGTGGGAGTCTTTTGTATGTCAGCC  
CTGCCATCTTGGCTGGAGTCCGCGAGGGCCTCCCTAATTATGGTCTGGCCGTGGAGGTTCTGCACCTCAACCAGACCCCA  
CACCACCAGGGCCGACACGTCGCGCATCAGCCGCTCGGTGCACCAAGAGCCCGGGGAGGACTGGGAACAGTTACGCCCTCT  
TTTGGTTACTTTTGGTTCATGATGGCAAGGGTACCCACTGACCCGGCGGACCAAGCGCAGCCCCAAACAACGGGGCCGCA  
AAGGCAGGCGCAACTGCCGGCGCCATGCACTGTACGTAGACTTCAGTGTGTAAGTGGAAATGACTGGATTGTGGCACCG  
CCTGGCTATCAGGCATATTACTGCCACGGGGAGTGGCCCTTTCCCCTGGCAGATCATTTAAACTCCACCAACCATGCCAT  
TGTTTCAGACACTGGTGAACCTCTGTGAATAACAACATTTCCCAAGGCCTGCTGCGTACCAACAGAGCTCAGCGCCATCTCCA  
TGCTCTACGTGGATGAACATGACAAGGTGGTCTGAGAACTACCAGGAAATGGTAGTGGAGGGCTGTGGCTGCCGCTAG

>XmaBMP16 (Southern platyfish; Acession number AGAJ01016356)

ATGCTCCCTGCTAACCTCCTGCTCCTCATGGTCTTGGTGTACCTCAAGCCTCGTCTGGCCGCCAGGGTGGAGAATCCAG  
CGAGACTGACAGTGGCAGGGTGGCCCCGACCCCTTCGTCGCCGCTCGCCCGCCGACGCGCTGCCCGATCCCGGTCTGGCTC  
AGACCATCCAGTCTCTCCTCCTGAGCCGGCTGGGCCTGCAGTCTCAGCCGAACCCAGGCCCGACGTTGCCGGTGGCCGAG  
TACCTCCTCGACCTTATCGCTTCCACCAGCAGTACCATTCTGTGGAAGACCCGACGTTACGCTTCCCCAGCCACCA  
CATTGAGCAGGCCAACACTATTTCGAGCTTTCACCACAGTATTCTCTGAGAGACAACAAAATAAGAGATCAGACAA  
GAGTGCACATTTCTTCAACATCTCCTCCATACTCAAGATGAAACGGTTCTCTCTGCTGAGCTTCGCCTGCTCCGCGAGC  
CAGGCAGTGTCCCTGGGCCCGGGCCTCACAGATTAACCTGTACCTCTCTAAACACTATGAGGATCCTGAGCCACGTT  
GCTTGGACAAAGACTACTCACCAGTGGCCTCCATGGCATTAAAGCCGGTAGTTTCTGGGAGGCATTTAGCCTAAATGCGG  
ACCTCCTCCGTAAAGCCCATGGTGGGACTGGCAGCTTGGGCTTTCTCCTGGAGGTGAGACCTGAAAACAGCACACCTCA  
CCTGACCAGAGCAACTCTTCTGCTGCAGGTGATAATCAGTCAGAGCAACATCAGGAGAGACACCTGAGGGTGTCCAGGTC  
GGTGGGACAGGACGATCACAGCTGGGCCAGGAGAGACCCCTCCTGGTACTTACAGTCATGACGGCCATGGAGAGCCTT

TAGTCAAACACGGCAGGAGAACATCTGGTAACAGCAAGTGGATTAAGGCTAGAAAAGGGTCAAACATGAAGACCAAGAGA  
AGCGGCAAAGGCCACAATAGAGACCAAGGCTGGGGGAAGACCCGAAAAATGGGTTACTCCATGAAGAGCTGGGGGGACGA  
CAAAGGGGAGGTAAGCTGGCGTGATCGTGGAAGAGTGAAAAGAAACGGCAGTCCCGCTAAGCTGAAGCGGCTTTCCCGTG  
GCAGGTGCCGGCGTCATCCTCTACATGTAGATTTAGAGATGTGGGCTGGCACAAATGGATCATCGCGCCGAGCGGCTAT  
GACGCCTTCTTCTGCCCTGGGAGAGTGCCTTACCCTCTGGCCGACCACATGAACGCCTCCAGCCATGCCGTGGTCCAAAC  
CATGGTAAACTCTGTGAACGGAGCAGTCCCCGGGCCTGTTGCGTCCCACCTCCCTCAGCCCCATTGCCCTGCTTTACC  
TGGACAATCACGACAGAGTCTGTAAAGAATTACCAGGACATGGTGGTGGAAAGCTGCGGCTGCTGGTAG

>LchBMP2 (Coelacanth; Accession number JH126648.1)

ATGGTTGCCGGAGTCCGCTCTCTCATGGTTCTGCTGCTCTGCCAGGTCCTTCTTGGAGGTTCCGGCCGGGCTCATCCCGGA  
GGTGGGCGGGCGCAAGTTCACCGAGTCTGGCCGCTCCAGCCCCAGCAAAGCGAAGAGATCCTCAACGAGTTTGAGCTCC  
GGCTGCTCAACATGTTCCGACTGAAGCGGCGGCCAACCCTGGCAAGAGCGCCGTGATCCCGCAGTACATGCGGGACCTG  
TACCGCCTGTATTCCCGGAGTGGTGAGGACAGTCTGGACCAGCACGGATCATCCCTAAATCCACAGCTGGAAAGATCTGC  
TAGTCGGGCCAACACTATCAGGAGTTCCACCATGAAGAATCTTTGGAGGAACTACCAGAACTGGTACAAAAACAGCAC  
GGCATTCTTCTTTAATTTATCTTCCATCCCTGGGGAGGAAATGCCTGCCTCAGCTGAACCTACGGATTTTTTCGTGAAGAG  
GTCCAACCAACCTTGGCAAATAATTCCAGTGGCCACCACCGAATTAATATTTATGAAATTATAATGCCAGCCTCATCCAC  
ACTGAGGGATCCCATACAAGACTGCTAGACACCAGATTGGTGCACCAAAGCCAGAGCAAATGGGAGAGTTTTGATGTGA  
CCTCTGCTGTATGAGGTGGCTAATGTACCAGGAACCAATCATGGATTTGTGGTAGAAGTGGTCCACGTGGACAAAGAG  
GAAAGTGCCTCCAAAAGACATGTTAGGATTAGCAGGTCTTTGCATGAAGATGAAGAAAGTTGGCCTCAGATGAGGCCATT  
ATTAGTAACTTTCAACCACGATGGTAAGGGACACCCTCTCCATAAAAAGGGAGAAGCGCCAGGCAAGACCGAAACACAGGA  
GACGGCTGAAATCGAGCTGTAGGAGGCATGCTTTGTATGTGGACTTCAGTGATGTAGGGTGGAAATGACTGGATAGTTGCT  
CCTCCAGGGTATAATGCCTATTATTGCCATGGGGAATGCCATTTCCACTAACGGATCACCTGAACTCAACCAACCATGC  
CATTGTTACAGACTTTGGTCAATTCTGTCAATTCAAATATTCCTAAAGCCTGCTGTGTGCCACAGAACTCAGTCCCATCT  
CCATGCTCTATCTTGATGAGTATGACAAGGTTGTATTAAGGAATTATCAAGATATGGTTGTGGAGGGTTGTGGTTGTCCG  
TGA

>LchBMP4 (Coelacanth; Accession number JH126564.1)

ATGATTCCTGGTAACCGAATGCTGATGATAATTTTATTATGCCAAGTCCTATTAGGGGGTAATACCCATACTAGTTTAAAT  
ACCTGAGAAGGGGAGAAAAAAGTTTTCAGAGATTCAGGGCCAGGCAGGAGGACGTCGCTCTGGGCAAAGCCATGAACTCT  
TGCGGGAATTTGAGGCAAGTTTGTGTCAGATGTTCCGATTGCAGAGACGGCCCCAGCCAGTAAATCGGTCGTGTCCTCC  
CGTTACATGCTGGATCTGTACCGATTCCAGTCCGGGGATGAAAACGTAAAGGATATCAACTTTAAATACCCCCGAGAGATC  
CACGAGCCGGGCCAACACAGTCAGGAGCTTCCATCACGAAGAACGCTTGGAAAAGGATTCCGGCCAACAGCGCAGACTCCT  
TAAGCCACTTTTATATTTAACATCAGCAGTCTTCTGAAAACGAAGTGTTCCTCTGCAGAGCTGAGACTTTATAGGGAA  
CAGATAGAACAAGGTCCCAGTTGGGAAGAACATTTTACAGAATCAACATTTATGAGGTCATGAGACCACCTAGCAGAAA  
TGGACAACCTTATTACCAGACTACTGGACACTAGGCTGGTGCATCAGAATGCCACACAATGGGAAAGTTTTGATGTGAGTC  
CAGCTGTTGTGAGATGGATCAGGGACAAACAACCATATCGTGGGTTTGTGTTGAGGTCATCCACCTTAACCAAAACAAAA  
ACCCATCAGGGGAAACATGTCAGGATTAGCCGATCTTTACCTCAAGGGGATACAGATTGGTCCCAGTTGAGACCCTTTT  
GGTCACTTTTACTCATGATGGCAAAGGACATGCACTGACCAGGAGGGTAAAAGGAGCGCTAAACATCAAAGATCCAGGA  
AGAAAAACAAAACGTAGGAGACATGCTCTTTATGTGGATTTTAGCGATGTGGGCTGGAATGACTGGATTGTGGCACCA  
CCTGGTTACGACGCATATTACTGCCATGGGGACTGCCCTTTCCCTTGGCTGATCATCTGAACTCTACCAACCATGCTGT  
CGTTCAAACCTTGGTCAACTCAGTCAACTCAAATATACCAAAGCTTGGCTGTGTGCCACTGAGCTCAGCGAAATCTCAA  
TGCTTTACGTAGACGAACATGACAAGGTTGTCTCAAAAACATAAGGATATGGTAGTACAAGGGTGTGGATGCCGTTGA

>LchBMP16 (Coelacanth; Accession number ENSLACT0000009133)

ATGGTCCCTGCTAACCTGTTATTTCCTGATGCTTCTCTTGCCACCCTATAACCCTTTTGGGTTCTGAGGACATTTTGCACCA  
GCAAGAAGTCTGCCAGCTCCACCCTCCTGTCAAGAAGACCACCAACCGCACCCCTTGACCTCAATGTGATCCGGTCTG  
TTCAGACCCTCCTGCTGACCCGCTTGGGGTCCGGAGCTGCCCCAGCCAAAACCAGGCCTCCTTATCCCTCAGTATATG  
TGGGACCTGTACCGGTACCATCTGGAGACCTTCCCGCAATCCAAGACTCAGGATTCCAGATCCAGAAGAACACACAGG  
GAAAGCAAACACCATCAGGGCCTTTCATCATCTTGAAGGACCAGAGAATGTTGGTGAGCCACAGGAAGACCAGATTTTTA  
ATTTTCAGTTCAATATTTCTCTATTCCCGGGGATGAGAAGGTGACTTCAGCCGAACTCCGTTTGCACAAAGAGAAGCCC  
AAAAGCTATGGAAATCCCTGCTACAAAGGGTTAACCTCTACCATATCACAGATCTCCAATCCAGGAGACGCCAACTTCT  
AGAGACCAGGGTGTGACTCCTAACTGGGCCAGTGGGAGAGTTTTGATGTTACTCCTGCTGTGCTCATGTGGCTTCAAG  
ATAGCATGGCTAATATGGAGTTTATGATTGAGGTGGTCCATCAAAATGGAACCAAGTAGATTGGAACCAGAGTGGATAT  
CTGAGGGTGGAGGTCACCTGGTGAAGGTGAGGAAACCTGGGTTTCATCAGAGGCCATTATTAGTACCTATAGTCATGA  
CGTTCGTGGCCAGCCTCTGGCACGAAGGACCAAAATAAAAGGAATGGGAAGATGCAGAAGTCAAAGAAGCGAGCAAAGC  
CTAGATGCAAGAGGCATCCATTATTTGTTGACTTCAAAGATGTTGGGTGGAACAAATGGATTGTTGCCCAAGTGGTTAT  
CGTGCCTTTTACTGCCATGGTGAATGTGTTTTCCCTTAGTGGATCACATGAACTCTTCCAGCCATGCCATGGTGCAGAC  
ATTGGTAAACTCAGTAAATTTCAAAGTGGCCAGGGCATGCTGTGTGCCACGGACCTAAGCCCAATCGCCATGCTCTATC  
TGGACCAACATGAGAGGGTGGTCTCAAGAACTACAATGACATGGTAGTGAAGGCTGTGGCTGCCGATGA

>AmexBMP2 (Axolotl; Accession number EU339232)

ATGGTGGCCGGGATGCGCTCGTGTCTGGTGTGCTCCTGTACCAAGTGTGCTGCTGGGCGGCTCGGTGGGGCTCATCCCGGA  
GGTGGGCGGGCGCCGCTTCGCCGAGTCGAGCCGGGGCCCTGCCAGCGCGGGCCCCAGCAGCAGCAGCAGCAGCAGCTCCG  
AGGACGTGCTGCGCGAGTTCGAGCTCCGCTGCTGCACATGTTCCGCTGAAGCGGCGGCCAGCCGAGCGCCGGCGCC

CCCATCCCGCCCTACATGCGCGACCTGTACCAGGGCCAGGGCCTGGACCTCCGGCAGGAGCGCTCCGCCAGCCGCGCCAA  
CACCGTCCGCAGCTTCCACCATGAAGAAGTTTTTGAAGGCCTGCCTGAAGCAAGCGGAAAAGTCTGCAGCGTTTTCTTCT  
TCAACTTGACTTCTATCCCTAACGAGGAGTTTATCACCTCGGCTGAACTCCGGATTTTTTCGAGAACTGGTACAGGAGACC  
TCTGGCGGGAACAGCAGCACGCACCCGATTAATATTTATGAAATCCTCAAGCCCCCGCCGCGGGGGCCCCAGGAGCTGGT  
CACGCGGCTGCTGGACACCCGGCTGGTGCAGCCCAACGCCAGCAGCTGGGAGAGCTTCGACGTGACCCCGGCCGTGCTGC  
GGTGGCAGGTGCACGGGACCCCAACCACGGCTTCGTGGTGGAGGTGGCCACCTAGACAGTGAGCGCGGCCCTGGCCAG  
CGGCAGTCCGCTCCGCCCTCCCGCAGCAGGACCGCACAGCTGGGCCCAGCTCCGGCCCCCTTTAGTAACTGCTTTGG  
CCACGACGGCAAGGGCCACCCGCTGCACCGGCGGAAAAGCGCCAGGCGCGCCAGCGGCAGCGCAAGCGCCTCAAGTCCA  
ACTGCCGGAGGCACCCCTCTACGTGGACTTCAGCGACGTGGGCTGGAATGACTGGATCGTGGCGCCCCGGGATACCAC  
GCCTTCTATTGCCACGGGGACTGCCCTTCCCTCTGGCGGACCACATGAACTCCACGAACCATGCCATCGTGCAGACTTT  
GGTCAACTCTGTGAATGCCAACATCCCAAGGCTTGCTGCGTGGCCACCGAGCTGAGCGCCATCTCCATGCTCTACCTGG  
ACGAGAACGAAAAGGTGGTGTCAAGAATTACCAGGACATGGTCTGGAGGGTTGTGGGTGTCATTAG

>EcoBMP4 (Common coqui; Accession number AY525159)  
ATGATTCCTGGTAATCGAATGCTGATGGTCATTTTTATTATGCCAAGTCCTGCTAGGAGGTACTAGCCATGCTAGTCTGAT  
CCCTGAGACCGGAAAGAAGAAAGTGGCTGAGATTTCAGGGCCAGGCGGGTGAAGGAGGTCTGCTCAGAGCCATGAGCTCT  
TGCGGGACTTTGAGACAACGCTGCTGCAGATGTTTGGCCTCCGCAAGCGGCCGCAACCCAGTAAGGAAGTGGTGGTGCCT  
GCGTATATGCGGGACTTGTACCGACTACAGTCAGCAGAGGAAGAGGATGAGTTTTCAGGAGATCAACTTGAATATCCTGA  
GAGACCTACAAGCCGTGCCAATACCGTGAGGAGCTTCCACCATGAAGAATATTTGGAGAACATACCGGGCACAGCTGAAA  
ACGCCGGCATCCGCTTTTACTTCAATCTCAGCAGCATTCCTGAGAATGAGGTGATTTCTTCAGCTGAGCTAAGACTTTAT  
AGAGAACAAATGAACATGGCCCAGCATGGGAAGAAGGCTTTCATAGAATAAATATATATGAAGTTATGAAGACTCTGAC  
AGCAAATGGACAGATGATTACTAGGCTACTGGACACCAGACTAATCCATCACAATGTGACTCGGTGGGAAAGTTTTGATG  
TAAGTCCAGCAATATGAGGTGGACCCAAGTCAAGGGAATTAACCATGGGCTTGCTGTTGAGGTCATTCATCTCAACCCAG  
ACTAAAATTTATCAGGGGAAGCATGTCCAGGATTAGCCGATTTATTACTCAAGATAATGCAGACTGGTTCACAGTGGAG  
GCCACTTCTAATTACATTTAGCCATGATGGCAGGGGACATGCCTGACCAGGAGTCCAAAAGAAGTCCATAACCCGACAG  
GAGCCCGTAAAAAGAACAATAATGCCCGGAGGCATTCTCTGTATGTGGATTTTCAGCGATGTAGGCTGGAATGATTGGATT  
GTGGCACACCTGGATATCAGGCTTTTTACTGCCACGGTGTATTGCCCGTTTTCCCTGGCTGACCACCTAAACTCAACCAA  
CCATGCCATTGTACAGACTCTGGTTAACTCCGTAAATTCAGCATTCCCAAAGCATGCTGTGTTCCACAGAACTGAGTG  
CTATTTCCATGCTCTATTTGGACGAGTATGACAAAGTAGTCCTTAAAAACTATCAGGAGATGGTAGTCGAGGCATGTGGC  
TGCGCTAA

>XtrBMP2 (Western clawed frog; Accession number NM\_001015963 and AC150281)  
ATGGTAGCTGGGATCCACTCTCTGCTCCTGCTGCTGTTTTACCAGATTTTGTGAGTGGCTGCACCCGGACTTATACCAGA  
GGAAGGCAAGCGGAAGTACACGGAATCTGGTCGCTCGTCTCCGCAGCACTCCAGAGTGTACTCAACCAGTTCGAGCTCC  
GGCTGCTCAATATGTTTGGCTTAAAGAGGGCGTCCAACGCCTGGCAAAAACATTGTGATCCCACCCCTACATGCTGGACTTG  
TACCACCTGCATTCAGGTCAGCTGGCTGCTGATCAAGACAGTTCCCCCATGGACTACCAGATAGAGCGTGCAGCTAGCCG  
AGCAAACACCGTTAGGAGCTTTCACCATGAAGAATCCATGGAAGAAATTCGGAGTCTGGCGAGAAAACAATCCAACGAT  
TCTTCTTCAACCTTTCTTCAGTTCCGAACGAGGAGCTGGTCACTTCTGCCGAGCTACGGATTTTTTCGAGAGGGGGTCCAG  
GAGCCATTTGAGGGTGACAGCAGCAAACTTCATCGGATTAATATTTATGATATTGTCAAGCCAGCAGCGGCTGCCTCCCG  
GGCCCCGTGTAAAGACTATTGGACACCAGACTGATACATATAACGAAAGCAAATGGGAAAGTTTTGATGTGACACCCG  
CAATTAGACCGGTGGATTGCACATAAACAGCCGAACCATGGGTTTTGTTGTAAGTACTCATTGGACAATGACAAAAAT  
GTGCCGAAGAAGCATGTGAGGATTAGCAGGCTTTTAGTCCAGATAAAGATAGCTGGCCTCGGATACGGCCGTTGTTGGT  
GACTTTTAGCCACGACGGCAAAGGACATGCGCTTCAAAAAGAGAAAAGCGCCAAGCAAGGCACAAAACAACGGAAACGCC  
TTAAATCGAGCTGCAGGAGGCATCCGTTGTATGTCGATTTTCAGCGACGTTGGTTGGAATGACTGGATTGTTGCCCCACCG  
GGGTATCATGCCTTTTACTGCCACGGGAATGCCCTTTCCCACTGGCAGACCATTTAAACTCTACAAACCAGCTATCGT  
GCAGACTTTGGTGAATAACGTCAACCCAAACATCCCCAAAGCTTGCTGTGTACCCACAGAACTCAGCGCCATCTCCATGC  
TCTACCTGGACGAGAACGAAAAGTAGTATTAATAAATTCAGGACATGGTGGTGGAGGGGTGCGGCTGCCGTTAG

>XtrBMP4 (Western clawed frog; Accession number NM\_001017034 and AJ315161)  
ATGATTCCTGGTAACCGAATGCTGATGGTCATTTTTATTATGCCAAGTCCTGCTAGGAGGCACTAACCATGCCAGCCTGAT  
ACCTGAGACGGGCAAGAAGAAAGTAGTGGCCGAGATTTCAGGGAGGTAGAAGGTCCGCTCAGAGCAATGAGCTCTTGCGGG  
ATTTGAGGTTGACGCTGCTGCAGATGTTCCGGCCTCCGCAAGCGGCCGAGCCAGTAAGGATGTGGTGGTGGCCGCGTAT  
ATGCGGGACCTGTACAGGCTTCAGTCAGCGGAGGAGGAGGATGAACTACACGATATCAGCATGGAGTACCCGGAGAGACC  
GACCAGCCGGGCTAACACCGTGAGGAGCTTCCATCATGAGGAGCATTGGGAGAATCTACCAAGCACAGCAGAAAATGGAA  
ATTTCCGTTTTGTGTTCAACCTCAGCAGCATTCAGAGAATGAGGTGATTTCTTCAGCAGAACTAAGACTCTATAGAGAA  
CAAATAGACCATGGTCCAGCGTGGGAAGAGGGTTTTCCACCGGATAAATATATATGAAGTTATGAAACCAATAACAGCAAG  
TGGACACATGATAAGTAGGCTGCTGGACACACGGCTAATCACCACAATGTGACACAGTGGGAAAGTTTTGATGTAAGCC  
CTGCAATTATAAGGTGGACCCGGATAAACAGATAAACCATGGGTTGCCATTGAGGTTGTTCCCTCACCTCAACCAACAAA  
ACTTATCAGGGAAGCATGTAAGGATAAGTCAGTCAATTATTACCTCAAGAGGATGCAGACTGGTTCACAGATGAGACCGCT  
TTTAATTACATTCAGCCATGATGGCAGGGGACATGCCTGACCAGGAGGTCAAAAAGAAGTCCAAAACAGCAAAGACCC  
GTAAAAAAAATAAACATTGCCCGGAGGCATTCTCTTTATGTGGATTTTCAGCGATGTTGGCTGGAATGACTGGATTGTGGCA  
CCTCTGGATACCAGGCTTTTTACTGCCATGGAGATTGTCCATTTCCCTTGGCTGATCACCTAAACTCAACTAACCATGC  
TATTGTACAACTCTGGTAAACTCTGTAACTCAAGCATCCCCAAAGCGTGTGGCTCCCCACAGATCTGAGTGCTATCT  
CCATGCTTTATTTGGATGAATATGACAAAGTCCTTAAAAACTATCAGGAGATGGTGGTGGAAAGGGTGTGGGTGCCGT

TAA

>AcaBMP2 (Green anole; Accession numbers XM\_003215309 , EU402671, FG668269, FG668317, FG670828, FG670684 and AAWZ02005417)

ATGACCATGGTTGCCAGGACCTGCTCTCTACTAGCACTGCTGCTTTCTCACATATTGCTTGGTGGTTTCGGCCAGTCTCAT  
CCCAGAGGTGGGGGACCGGCGCAGGTTTCAGTAGCGATTTGGGTGAGGCTGCCCCCTGCAGCTCTCGGAAGGGATCCTGC  
GTGAATTTGAACCTCGTCTGCTCAACATGTTTGGGCTCCAGCGACGGCCGACCCCAAGCAAGAATGCCATAATTCTCCT  
TATATGTTGGAGCTCTACCACCTGCACACGAGTCAGAAGCCAGCTACCATGGACTATAATCTGGAGAGAGCTACCAGCAG  
GGCCAATACAGTTAGGAGCTTCCACCATGAGGAATCACTGGAAGAGCTTCTGAAAGAAATGGGAAAACATCCCCGGCGTT  
TCTTCTTTGACTTAGCATCCATTCCAAGTGGGGAGTTTATCACTTTCAGCTGAGCTCCAGATTTTTTCGGGAGCAGGTCCAA  
GATACCTTTGGTAGCAACAGCAGCTCTCACCATCGTATTAATATTTATGAAATAATAAAGCCAGAGGGAGAGGCTTCTAA  
GGACCTTGTACAAGACTTTTGGACACCCGATTAGTGCATCACAATGCCAGCAAATGGGAAACCTTTGATGTAACACCAG  
CGCTAAGGAGATGGGTTGCGCATGGACAACCCAATCATGGTTTTGTGGTTGAGGTGTTGCATTTGGACAAGAAGAACAAT  
GTCTCCAAGAGGCATGTCAGGATCAGCAGGTCATTGCATCAGGACGATGGGAGCTGGTCTCAGCTCAGGCCGCTACTAGT  
AACCTTTGGACATGATGGGAAGGGCCACCCTCTCCATAGGCGAGAGAAACGCCAGGCCAAAATATAAAGAACGCAAACGCC  
ATAAATCCCATTGCAAAAGGCATCCTTTATACGTAGACTTCAATGATGTAGGGTGAATGACTGGATTGTGGCCCCACCG  
GGCTATAGTGCCTACCCTGCCGTGGAGATTGTCCCTTTCCATTGGCAGATCACCTCAACTCCACAAATCATGCCATTGT  
TCAGACTCTGGTCAATTTCAGTGAATTCAAAATCCCCAAAGCTTGTGTGTGCCGACGGAAGTGGTCTATCTCCATGC  
TCTACCTTGATGAAAATGAAAAGGTTGTACTCAAGAACTATCAAGACATGGTTGTGGAGGGCTGTGGTTGCCGCTGA

>AcaBMP4 (Green anole; Accession numbers GL343794.1)

ATGAAGCAGCCTAGAATTCCTTGCTGTCCCATGTTGTAATGCCGGCGCTGTTTTCTCTTCCCTCCCGCTTCCCAGAGCA  
CCTGGAGCAAGTGCCGGGTTTCGGATCCCCGCCTGGGTGCTTCCGCTTCTTCTTCAACCTGAGCAGCGTGCCTGGCGGTTG  
AGGCCATCTCTACCGCAGAGCTACGCTCTTTCTGAGCGGATCCCCGATGCTGCGGAGGACGACGAGGGTGCATCCAC  
CGGATCAACATTTACGAGGTGATGAAGCCGTGGCGGGGACGGGAGGACCCGGTCAACCGGCTGCTGGACACTCGCTGGT  
CGCCACAACGTGAGCGGCTGGGAGAGCTTCGACGTGAGCCAGCGGTTGTCGCGATGGACGGCGGGCGGTCAGCCCAACC  
ACGGCTTGGCGGTGGAAGCCCTCCACCTCCACCCCAAGCAGACTCACCAGGGCCGGCACGTCCGGATGAGCCGCTCTTTA  
CCTCAAGGCGGGGGCGCCTAGAGGACGGCGCTTGGGCCACCTCCGTCCTTCTGGTGACTTTTTGGCCACGACGGTCC  
CAGTGGCTCGGCCCTGACGCGGCGCCGGAGGGCCAAGCGGAGCCCCAAAGGACCCGGAGGCTCCGGCGGGCGGGCACAAC  
GCAAGGGCAAGAAGAAGTCCCGGCGCCATGCCCTCTATGTGGACTTCAGTGACGTGGGCTGGAACGATTGGATTGTGGCT  
CCGCGGGGCTACCAAGCCTTCTACTGCCACGGCGACTGCCCTTCCCTTGGCCGACCACCTCAACTCCACCAACCACGC  
CATCGTCCAGACGCTGGTCAACTCCGTCAACGGCAGCATCCCCAAGGCGTGTGCGTGCCACCGAGCTGAGCGCCATCT  
CCATGCTCTATTTGGACGAGTACGACAAGGTGGTCTCAAGAACTACCAGGAGATGGTGGTTCGAAGGATGCGGGTGCCGT  
TGA

>AcaBMP16 (Green anole; Accession numbers GAFZ01245723.1)

ATGGTGTCTGGTAACTTGGCTGTTCTGTGCGATGCTTTTTGTGTCACTTGCCTTCTGGAGATTTGAAGCCCCCAGGGAGC  
ATCACCTGGAACCGACAAACATGACCCTAGAGAAGTCCAATCCAGGCCCTCCACACTATCCTGTTAAGACGCCTAGGCT  
TGCAAAGGCGGCGGAACCAAAACCAGGCCACGTGGTCCCCCAGTACCTGCTGGATTTGTACCAATTTGCCTTAGGAAGG  
GTTCTCCCTCCTTGCAGGGAACGGATCTACCTTTCTTGGAGGAACAGGCGGGAAGAGCCAACACTGTGCGCACATTTCA  
TCATGTCGAGGATCCAGATTACTTTCTGACCTGTAGGAAATGAATTTTACTTCTTGTTCACCTCACCTTGCTGCCTG  
CAGAGGAGGACTGACTGCCCTTGAGTTGCGCCTCACCACAGAGAGAGAGAAAGCAAGGTTTTTCACATCAACCTACTAC  
CACAAATGGATCCCCACTCATTTCCAGAAACAAGAGCAGACTCCTGGCCCGCAAATTTCTGGCTCCAAACCAGTCCAA  
GTGGAAAGCTTTGATGTGACTCCTGCCTATAAGACAGCCAAGAACCAGAAGCTTCATCTTGGGTTTCTTGTGTGAGGTGG  
AGCACCCAAACAATAGCTATAACCTTCAAGAGCACACACATCCGCTCGTGCAAGACGGTCTCTTGGAGAGGAGGCAGCT  
CAGTGGGCTCTGGAGAGGCCCTTTACTAGTTACTTATAGCCACGACCAAAAGAGGGCAACCCCTGACACGTGAAAAAGACA  
CAACAGAAGTCAGTCAAATGCACTAACCCAGAAAGGAGGCAGAAAACCTACAAAAGGTGCGGTCTCCAAGAACAACACTCA  
AGAGCCTAAAGGCAAAGACCAAAATCAGTACCAAGTCAAAAAGGCACCGCTTGTGTGTAGATTTCAAAGAGGTTGGTTGG  
AACGATTGGATAGTTGCCCCAGTGGCTACCACGCATTCTACTGCTCTGGGGAATGTCAGTTCCCACTGGCTGACCATAT  
GAATTCCTCCAGTCATGCTGTGGTGCAGACAATGTTGAATTTCTGTGAACTCCAAAGTGCCTAAGCCATCTTGTGTTCTTA  
CAGACCTCAGTCCCATAGCTATGCTCTATCTGGATCAACATGACATGGTGGTCTTAAACCTATCAGGATATGGTGGTG  
CAGGGCTGTGGGTGCCGGTAA

>GgaBMP2 (Chicken; Accession numbers NM\_204358, X75914, BU137064, BU114214, BU444424, AL585496 and AADN02041168)

ATGGTTGCCGCCACCCGCTCCCTCCTGGCGCTGCTGCTCTGCCGGGTGCTGCTGGGCGGCGGGCCGGCCTCATGCCGGA  
GGTGGGACGGCGGCGCTTCAGCGAACCAGGCGCGCCGCTCGGCCGCGCAGCGCCCCGAGGACCTCCTGGGCGAGTTTCG  
AGCTGCGCCTGCTCCACATGTTTCGGGCTGAAGCGGCGGCGGAGCCCCGGCAAGGACGTCGTCATCCCCCCTACATGTTG  
GACCTCTATCGCCTGACAGCTGGCCAGCAGCTGGCTACCCGCTGGAGAGGGCCGACGCGCCCAACACCGTGCAGCAG  
CTTCCACCACGAAGAAGTTTTGGAAAGAACTGCCAGAAACAAGTGGGAAAACAGCAGCAGCTTTCTTTAATTTAACTT  
CCATCCCCTAATGAGGAGTCTGTACCTCAGCTGAACTCCAGATTTTTTCGGGAGCAGGTGCACGAAGCCTTTGAGAGCAAC  
AGCAGCTACCATCACCGTATTAATATTTATGAAATTTATGAAGCCAGCCACAGCCACCTCCAAGGACCCCTGTCACGAGACT  
TTTGGACACCAGGTTGGTGCATCATAATGCAAGTAAATGGGAAAGTTTTGATGTAACGCCAGCTGTTTTGAGGTGGATTG  
CACACGGACAACCTAACCATGGGTTTTGTGGTGGAGGTGGTTCACTTGGACAAAGAGAACAGTGCCTCCAAGAGGCACGTT

AGGATTAGCAGGTCTTTACATCAGGATGAAGATAGCTGGTCTCAGCTCAGGCCGTTGTTAGTGACGTTTGGGCATGATGG  
CAAGGGACACCCGCTCCACAAAAGAGAAAAGCGTCAAGCGAAACACAAACAGCGTAAGCGCCACAAATACAGTTGCAAAA  
GGCATCCGTTGTATGTGGACTTCAATGACGTGGGGTGAATGACTGGATTGTTGCCCGCCGGGGTACAGTGCCCTTTTAC  
TGCCATGGGGAATGTCTTTTCCGCTGGCAGATCACCTAAACTCAACAAACCATGCCATTGTTTCAGACTTTGGTCAATTC  
GGTGAATTCAAAATCCCCAAGGCTTGCTGTGTGCCGACAGAAGTGAAGTGTATCTCAATGCTCTACCTTGACGAGAACG  
AAAAGGTCGTACTAAAGAACTATCAAGATATGGTTGTGGAGGGCTGCGGGTGCCGCTGA

>GgaBMP4 (Chicken; Accession numbers NM\_205237, AC172371, BM426811, BU473912,  
BU244511, BU473786, BU268076, BU355305, BU217696, BU256447, BX259520, BU473508 and  
BU227272)

ATGATTCTCGGTAACCGAATGCTGATGGTCATCTACTATGCCAAGTCCTGCTGGGAGGTACCAACCATGCTAGCCTGAT  
CCCCGAGACCCGGCAGGAAGAAAGTCGCAGAGCTTCAGGGACAAGCCGGATCCGGACGCCGCTCTGCCCAAAGCCATGAAC  
TCTTGCGGGGTTTTCGAAACGACTCTGCTGCAGATGTTTGGGCTGCGAAGGCGGCCCCAGCCCAGCAAATCAGCCGTCATC  
CCCAGTTACATGCTGGATCTCTACCGGCTCCAGTCCGGAGAAGAGGAGGAGAGCCTCCAGGAGATCAGCCTGCAGTACCC  
GGAGCGATCGACCAGCCGGGCCAACACCGTGAGGAGCTTCCACCATGAAGAGCACCTGGAGAGCGTGCCGGGTCCCAGCG  
AAGTGCCGCGGATCCGCTTTCGTCTTCAACCTCAGCAGCGTGCCGGACAACGAGGTGATCTCGTCGGCGGAGCTGCGGCTG  
TACCGGGAGCAGGTGGAGGAGCCGAGCGCGGCTGGGAGAGGGGCTTCCACCGGATAAACATTTACGAAGTGATGAAGCC  
GCTGTGCGGAGCGCTCGCAGGCCATTACGCGCCTGTTGGACACGCGGTTGGTGCACCACAACGTGACGCGCTGGGAGACCT  
TTGATGTGAGCCCAGCCGTGATCCGGTGGACCAAGGACAAGCAGCCCAACCACGGGCTGGTGTGATCGAGGTGACCCACCTC  
CACCAGGCACAGACTCATCAGGGCAAACACGTCAGGATTAGCCGATCTTTACCTCAGGGGTACGGCGGGGACTGGGCGCA  
GCTCAGGCCGCTCCTGGTCACCTTCGGGCACGACGGGCGAGGCCACGCGCTGACCCGCAGGGCCCCGCCGAGCCCCAAGC  
ACCAGCGTTCCCGCAAGAACAAAAAACTGCCGCCGCCACGCTCTCTATGTGGATTTTCAGCGACGTGGGTGGAAACGAT  
TGGATCGTGGCCCCCGGGCTACCAGGCGTTTTACTGCCACGGGGACTGCCCTTCCCTCTGGCCGACCACCTCAACTC  
CACAACCACGCCATCGTGCAGACGTTGGTCAACTCCGTCAACTCCAGCATCCCCAAGGCCTGCTGCGTGCCACGGAGC  
TGAGCGCCATCTCCATGCTCTACCTGGATGAGTATGACAAGGTGGTGTGAAAAACTACCAGGAGATGGTGGTGGAGGGG  
TGCGGGTGCCGCTGA

>CpbBMP2 (Painted turtle; Accession number AHGY01038458)

ATGGTGGCCGCCATCCGCTCCCTGCTAGCGCTGCTGTGTACCAGGTGCTGCTGGGCGGCTCGGCCGGGCTCATCCCGGA  
GGTGGGCGCGCGCGCTTCAGCGACTCGGGCCGCGCCGCCCGCAGGAGCTGCTGAGCGAGTTTCAGCTGCGTCTGCTCA  
ACATGTTCCGGCTGAAGCGGCGGCCGAGCCCCAGCAAGAACGCCGTCATCCCGCCCTACATGCTGGACCTCTACCGCCTG  
CAGGCCGGCCAGCAGCTGGGCCACTCCGCCCGGGCTACCCGCTGGAGAGAGCCGCCAGCCGCGCCAACACGGTCCGGAG  
CTTCCACCACGAAGAAGCTTGGGAAGAGCTCCCAAGAAGCAAGTGGGAAAACAGCACGGCGCTTCTTCTTTAATTTAACTT  
CCATCCCTAACGAGGAGTTTTCTCACCTCGGCTGAACCTTCAGATTTTTCCGGGAGCAGGTGCAGGAAACCTTTGAGAACAAT  
AGCAGCTACCATCACCGTATTAATATTTATGAAATTATAAAGCCAGCCACAGCCACTTCTAAGGACCCTGCCGCAAGACT  
TTTGGACACCAGGTTGGTGCATCAGAATGCAAGTAAATGGGAAAGCTTTGATGTAACACCAGCTGTAATGAGGTGGATTG  
CACATAGACAGCCTAATCATGGGTTTATAGTAGAGGTGGTTCACTTGGACAATGAGAGCAGTGTTCGAAGAGGCACGTT  
AGGATTAGCAGGTCTTTGCATCAGGATGAAGATAGCTGGTCTCAGCTCCGGCCGTTGTTAGTAACTTTTGGCCATGATGG  
CAAGGGACACTCTCTCCATAAAAAGAGAGAAACGCCAAGCAAACACAAACAGCGCAAACGCCACAAATCCAGTTGCAAAA  
GACATCCTTTATATGTGGACTTCAATGACGTGGGGTGAATGACTGGATTGTTGCCCCACCAGGATATGGTGCCTTTTAC  
TGCCATGGGGAATGCCCTTTTCCATTGGCAGATCACCTAAACACAACAACCATGCCATTGTTTCAGACTTTGGTCAATTC  
CGTGAATTCAAAATCCCTAAGGCTTGCTGTGTTCCGACAGAAGTGAAGCGCTATTTCCATGCTCTACCTTGACGAGAACG  
AAAAAGTTGTATTAAGAAGCTATCAAGATATGGTTGTGGAGGGTTGTGGGTGCCGCTAA

>CpbBMP4 (Painted turtle; Accession number XM\_005295477.1)

ATGATTCTCGGTAACCGAATGCTGATGGTCATTCTGTTATGCCAAGTTCTGCTAGGAGGTACTAACCATGCCAGTTTGGAT  
ACCCGAGACGGGGAGGAAGAAAGTTGGAGAACTCCAGGCTCACGCAGGATCTGGACGCCGCTCCGGGCCAAAGCCATGAAC  
TCTTGCGGGGTTTTCGAGGCGAGTTTGCCTGCAGATGTTCCGGCTCCGCAGGCGGCCCCAGCCCAGCAAAGCAGCCGTCATC  
CCCGCTACATGCTGGATCTCTATCGGCTGCAGTCCGGGGAAGAGGAGGAAAGCCTGCAGGACATCAGCCTGCGGTATCC  
CGAGAGATCCACTAGCCGGGCCAACACCGTGAGGAGTTTCCACCATGAAGAACATCTGGAGAACCTCCCCGGGCCAGCG  
ACACCCCCCGGTTTCGCTTCCCTTCAACCTCAGCAGCGTGCCGGAGAACGAGGTGATCACCTCGGCCGAGCTGCGGCTG  
TACCGGGAGCAGCTGGAAGCGCGGAGCCCCGCGTGGGAACGGGGCTCGCACCGGATCAACATCTACGAAGTGATGAAGCC  
CCCGCCGGCCCGCGGGCAGGTGATCACGCGGCTGCTGGACACGCGGCTGGTGCATCACAACGTGTCCCGGTGGGAGAGCT  
TCGACGTGAGCCCCGCGCTCCTCCGCTGGACCCAGGACAGGCAGCCCAACCACGGGCTGGCGGTGGAGGTGACCCCGCTG  
CCCCCGCCCCCGCGGGCCCCGGGAACCACGTCAGGATTAGCCGATCTTTACCTCAAGGAGACGGGGACTGGGCCAGTT  
GAGGCCGCTGCTGGTCACTTTTCAGCCACGACGGCAGGGGCCACGCACTGACCCGCCGGGCCCGCCGAGCGCCAAGCACC  
AGCGGCCCGCAAGAACAACAAAAAACTGTGACGCCACGCGCTATGTGGATTTTCAGCGACGTGGGTGGAAACGACTGG  
ATCGTGGCCCCCGGGCTACCAGGCTTTTACTGCCACGGGGACTGCCCTTCCCTTTGGCCGACCACCTCAACTCCAC  
CAACCACGCCATCGTGCAAACCTGGTGAACCTCCGTCAACGCCAGCATCCCCAAGGCCTGCTGCGTGCCACGGAGCTGA  
CGCCATCTCCATGCTCTACCTGGACGAGTATGACAAAGTGGTCTGAAAAACTACCAGGAGATGGTGGTGGAGGGGTGC  
GGGTGCCGTTAA

>HsaBMP2 (Human, Accession numbers NM\_001200 and NT\_011387)

ATGGTGGCCGGGACCCGCTGTCTTCTAGCGTTGCTGCTTCCCCAGGTCCTCTGGGCGGCGGGCTGGCCTCGTTCCGGA



GCTGGGCCGCGAGGAAGTTCGCGGGCGGCGTTCGCGGGCCGCCCTCATCCCAGCCCTCTGACGAGGTCTGAGCGAGTTTCG  
AGTTGCGGCTGCTCAGCATGTTTCGGCCTGAAACAGAGACCCACCCCCAGCAGGGACGCCGTGGTGCCTTACATGCTA  
GACCTGTATCGCAGGCACTCAGGTCAGCCGGGCTCACCCGCCCCAGACCACCGGTTGGAGAGGGCAGCCAGCCGAGCCAA  
CACTGTGCGCAGCTTCCACCATGAAGAATCTTTGGAAGAACTACCAGAAACGAGTGGGAAAACAACCCGGAGATTCTTCT  
TTAATTTAAGTTCATCCCCACGGAGGAGTTTATCACCTCAGCAGAGCTTCAGGTTTTCCGAGAACAGATGCAAGATGCT  
TTAGAAAACAATAGCAGTTTCCATCACCAGAAATTAATATTTATGAAATCATAAAACCTGCAACAGCCAACTGCAAAATCCC  
CGTGACCAGACTTTTGGACACCAGGTTGGTGAATCAGAATGCAAGCAGGTGGGAAAGTTTTGATGTACACCCCGCTGTGA  
TGCGGTGGACTGCACAGGGACACGCCAACCATGGATTTCGTGGTGGAAAGTGGCCCACTTGGAGGAGAAAACAAGGTGTCTCC  
AAGAGACATGTTAGGATAAGCAGGTCTTTGCACCAAGATGAACACAGCTGGTTCACAGATAAAGGCCATTGCTAGTAACCTT  
TGGCCATGATGGAAAAGGGCATCCTCTCCACAAAAGAGAAAACGTCAAGCCAAACACAAACAGCGGAAAACGCCCTTAAGT  
CCAGCTGTAAGAGACACCTTTGTACGTGGACTTCAGTGACGTGGGGTGGAAATGACTGGATTGTGGCTCCCCGGGGTAT  
CACGCCTTTTACTGCCACGGAGAATGCCCTTTTCTCTGGCTGATCATCTGAACTCCACTAATCATGCCATTGTTTCAGAC  
GTTGGTCAACTCTGTTAACTCTAAGATTCCTAAGGCATGCTGTGTCCCACAGAACTCAGTGCTATCTCGATGCTGTACC  
TTGACGAGAATGAAAAGGTTGTATTAAGAAGTATCAGGACATGGTTGTGGAGGGTTGTGGGTGTCTGCTAG

>HsaBMP4 (Human; Accession number NM\_001202.3)

ATGATTCCCTGGTAACCGAATGCTGATGGTTCGTTTTATTATGCCAAGTCCTGCTAGGAGGCGCGAGCCATGCTAGTTTGGAT  
ACCTGAGACGGGGAAGAAAAAGTCGCCGAGATTTCAGGGCCACGCGGGAGGACGCCGCTCAGGGCAGAGCCATGAGCTCC  
TGCGGGACTTCGAGGGCAGACTTCTGCAGATGTTTGGGCTGCGCCGCCGCCCGCAGCCTAGCAAGAGTGGCGTCAATTCCG  
GACTACATGCGGGATCTTTACCGGCTTCAGTCTGGGGAGGAGGAGGAAGAGCAGATCCACAGCACTGGTCTTGAGTATCC  
TGAGCGCCCGGCCAGCCGGGCCAACACCGTGAGGAGCTTCCACCACGAAGAATCTGGAGAATATCCAGGGACCAGTG  
AAAATCTGCTTTTCGTTTCTCTTTAACCTCAGCAGCATCCCTGAGAACGAGGTGATCTCTCTGCAGAGCTTCGGCTC  
TTCCGGGAGCAGGTGGACCAGGGCCCTGATGGGAAAGGGGCTTCCACCGTATAAACATTTATGAGGTTATGAAGCCCC  
AGCAGAAGTGGTGCCTGGGCACCTCATCACAGACTGACACAGAGACTGGTCCACCACAATGTGACACGGTGGGAAA  
CTTTTGGATGTGAGCCCTCGCGTCTTCGCTGGACCCGGGAGAAGCAGCAAACTATGGGCTAGCCATTGAGGTGACTCAC  
CTCCATCAGACTCGGACCCACCAGGGCCAGCATGTCAGGATTAGCCGATCGTTACCTCAAGGGAGTGGGAATTGGGCCA  
GCTCCGGCCCCCTCTGGTACCTTTGGCCATGATGGCCGGGGCCATGCCTTGACCCGACGCCGGAGGGCCAAAGCGTAGCC  
CTAAGCATCACTCACAGCGGGCCAGGAAGAAGAATAAGAACTGCCGGCGCCACTCGCTCTATGTGGACTTCAGCGATGTG  
GGCTGGAATGACTGGATTGTGGCCCCACCAGGCTACCAGGCCTTCTACTGCCATGGGGACTGCCCTTTTCCACTGGCTGA  
CCACCTCAACTCAACCAACCATGCCATTGTGCAGACCCTGGTCAATTCTGTCAATTCCAGTATCCCCAAAGCCTGTTGTG  
TGCCCACTGAACTGAGTGCCATCTCCATGCTGTACCTGGATGAGTATGATAAGGTGGTACTGAAAAATTATCAGGAGATG  
GTAGTAGAGGGATGTGGGTGCCGCTGA

>MmuBMP2 (Mouse; Accession number NM\_007553.2)

ATGGTGGCCGGGACCCGCTGTCTTCTAGTGTGCTGCTTCCCCAGGTCCTCTGGGCGGCGCGGCCGGCCCTCATTCCAGA  
GCTGGGCCGCAAGAAGTTCGCCGCGGCATCCAGCCGACCCTTGTCCCGCCTTCGGAAGACGTCTCAGCGAATTTGAGT  
TGAGGCTGCTCAGCATGTTTGGCCTGAAGCAGAGACCCACCCCCAGCAAGGACGTGCTGGTGGCCCCCTATATGCTAGAT  
CTGTACCAGCAGGCACTCAGGCCAGCCAGGAGCGCCCGCCCCAGACCACCGGCTGGAGAGGGCAGCCAGCCGCGCCAACAC  
CGTGCGCAGCTTCCATCACGAAGAAGCCGTGGAGAACTTCCAGAGATGAGTGGGAAAACGGCCCGGCGCTTCTTCTTCA  
ATTTAAGTTAGTCTCCCAAGTACGAGTTCACATCTGCAGAACTCCAGATCTTCCGGGAACAGATACAGGAAGCCTTTG  
GGAAACAGTAGTTTCCAGCACCGAATTAATATTTATGAAATATAAAGCCTGCAGCAGCCAACTTGAATTTCTGTGAC  
CAGACTATTGGACACCAGGTTAGTGAATCAGAACACAAGTCAAGTGGGAGAGCTTCGACGTCACCCAGCTGTGATGCGGT  
GGACCACACAGGGACACACCAACCATGGGTTTTGTGGTGGAAAGTGGCCATTTAGAGGAGAACCAGGTGTCTCCAAGAGA  
CATGTGAGGATTAGCAGGTCTTTGCACCAAGATGAACACAGCTGGTTCACAGATAAAGGCCATTGCTAGTGACTTTTGGACA  
TGATGGAAAAGGACATCCGCTCCACAAAAGAGAAAAGCGTCAAGCCAAACACAAACAGCGGAAGCGCCTCAAGTCCAGCT  
GCAAGAGACACCTTTGTATGTGGACTTCAGTGATGTGGGGTGGAAATGACTGGATCGTGGCACCTCCGGGCTATCATGCC  
TTTTACTGCCATGGGGAGTGTCTTTTCCCCTTGCTGACCACCTGAACTCCACTAACCATGCCATAGTGCAGACTCTGGT  
GAACTCTGTGAATTTCCAAAATCCCTAAGGCATGCTGTGTCCCACAGAGCTCAGCGCAATCTCCATGTTGTACCTAGATG  
AAAATGAAAAGGTTGTGCTAAAAAATTATCAGGACATGGTTGTGGAGGGCTGCGGGTGTCTGTTAG

>MmuBMP4 (Mouse; Accession number BC013459.1)

ATGATTCCCTGGTAACCGAATGCTGATGGTTCGTTTTATTATGCCAAGTCCTGCTAGGAGGCGCGAGCCATGCTAGTTTGGAT  
ACCTGAGACGGGGAAGAAAAAGTCGCCGAGATTTCAGGGCCACGCGGGAGGACGCCGCTCAGGGCAGAGCCATGAGCTCC  
TGCGGGACTTCGAGGGCAGACTTCTACAGATGTTTGGGCTGCGCCGCCGCTCCGCAGCCTAGCAAGAGCGCCGTCAATTCCG  
GATTACATGAGGGATCTTTACCGGCTCCAGTCTGGGGAGGAGGAGGAGGAAGAGCAGAGCCAGGGAAACCGGGCTTGAGTA  
CCCGGAGCGTCCCGCCAGCCGAGCCAACTGTGAGGAGTTTCCATCACGAAGAATCTGGAGAATATCCAGGGACCA  
GTGAGAGCTCTGCTTTTCTGTTTCTTCAACTCAGCAGCATCCCAGAAAATGAGGTGACTCTCTCGGAGAGACTCCGG  
CTCTTTCCGGAGCAGGTGGACCAGGGCCCTGACTGGGAACAGGGCTTCCACCGTATAAACATTTATGAGGTTATGAAGCC  
CCAGCAGAAAATGGTTCTTGACACCTCATCACAGACTACTGGACACAGACTAGTCCATCACAATGTGACACGGTGGG  
AAACTTTTCGATGTGAGCCCTGCAGTCTTTCGCTGGACCCGGGAAAAGCAACCCAATTATGGGCTGGCCATTGAGGTGACT  
CACCTCCACCAGACACGGACCCACCAGGGCCAGCATGTCAGAATCAGCCGATCGTTACCTCAAGGGAGTGGAGATTGGGC  
CCAACCTCCGGCCCCCTCTGGTCACTTTTGGCCATGATGGCCGGGGCCATACCTTGACCCGACAGGAGGGCCAAACGTAGTC  
CCAAGCATCACCCACAGCGGTCCAGGAAGAAGAATAAGAACTGCCGTGCCATTCACTATACGTGGACTTCAGTGACGTG  
GGCTGGAATGATTGGATTGTGGCCCCACCCGGCTACCAGGCCTTCTACTGCCATGGGGACTGTCCCTTTTCCACTGGCTGA

TCACCTCAACTCAACCAACCATGCCATTGTGCAGACCCTAGTCAACTCTGTTAATTCTAGTATCCCTAAGGCCTGTTGTG  
TCCCCACTGAACTGAGTGCCATTTCCATGTTGTACCTGGATGAGTATGACAAGGTGGTGTGAAAAATTATCAGGAGATG  
GTGGTAGAGGGGTGTGGATGCCGCTGA
