# Supplementary material
Source: PubMed Central journal article supplement (PMC11108344)

**Online resource 2.** Phylogenetic analyses of 58 BMP gene sequences. (A) RAxML 7.8.4-MPI ML optimal tree search GTR+ $\Gamma$ +Fest 400 replicates. Likelihood:  $-\ln L = 17343.6220$ ; (B) RAxML 7.8.4-MPI ML bootstrap GTR+ $\Gamma$ +Fest 400 replicates; (C) MrBayes MCMC GTR+ $\Gamma$ +I marginal likelihood:  $-\ln L_h = 17419.5992$ . 2 chains, 5,000,000 generations, 10,000 samples, 2,000 burnin each chain; (D) P4 MCMC GTR+ $\Gamma$ +I marginal likelihood:  $-\ln L_h = 17430.2044$ . 2 chains, 1,000,000 generations, 5,000 samples, 200 burnin each chain. Posterior predictive simulations of  $\chi^2$  statistic of composition homogeneity: original statistic = 469.8018, the distribution goes from 43.1524 to 142.2298, the tail-area probability = 0.0000; (E) P4 MCMC GTR+ $\Gamma$ +I+CV2 Marginal likelihood:  $-\ln L_h = 17045.6169$ . 2 chains, generations, samples, burnin each chain. Posterior predictive simulations of  $\chi^2$  statistic of composition homogeneity: original statistic = 469.8018, the distribution goes from 248.3454 to 772.3124, the tail-area probability = 0.4613; (F) CodonPhyML GY+ $\omega$ + $\kappa$ +Fest non-synonymous/synonymous  $\omega$  parameter value of 1.0 fixed for all sites. Likelihood:  $-\ln L = 19333.7$ ,  $\kappa = 2.3671$

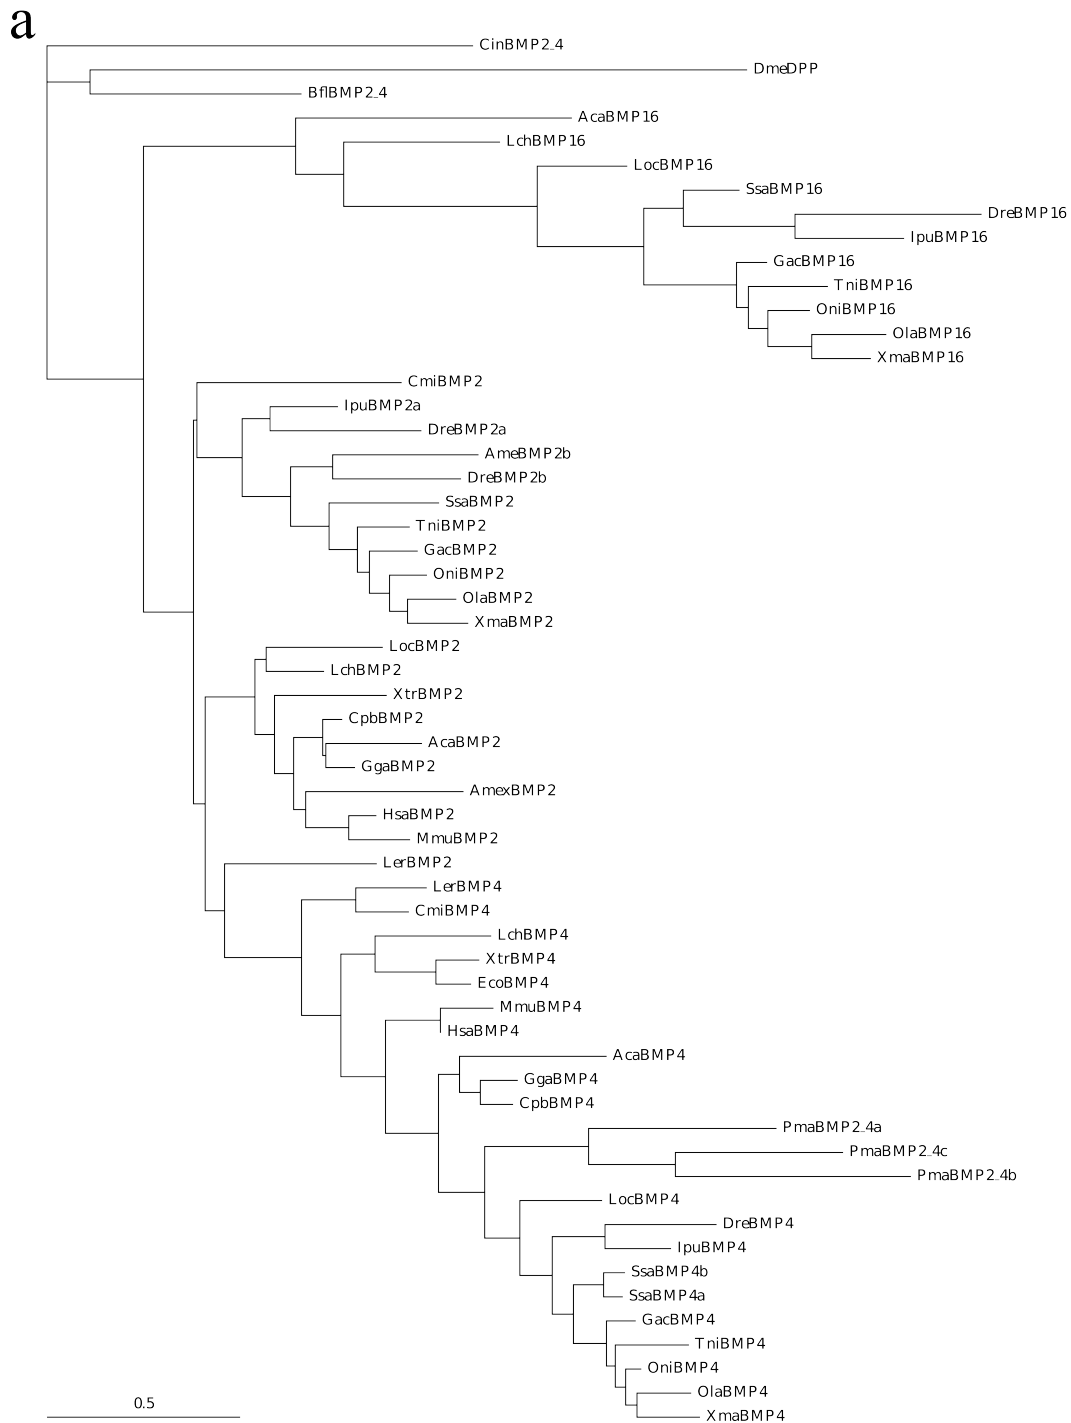

**b**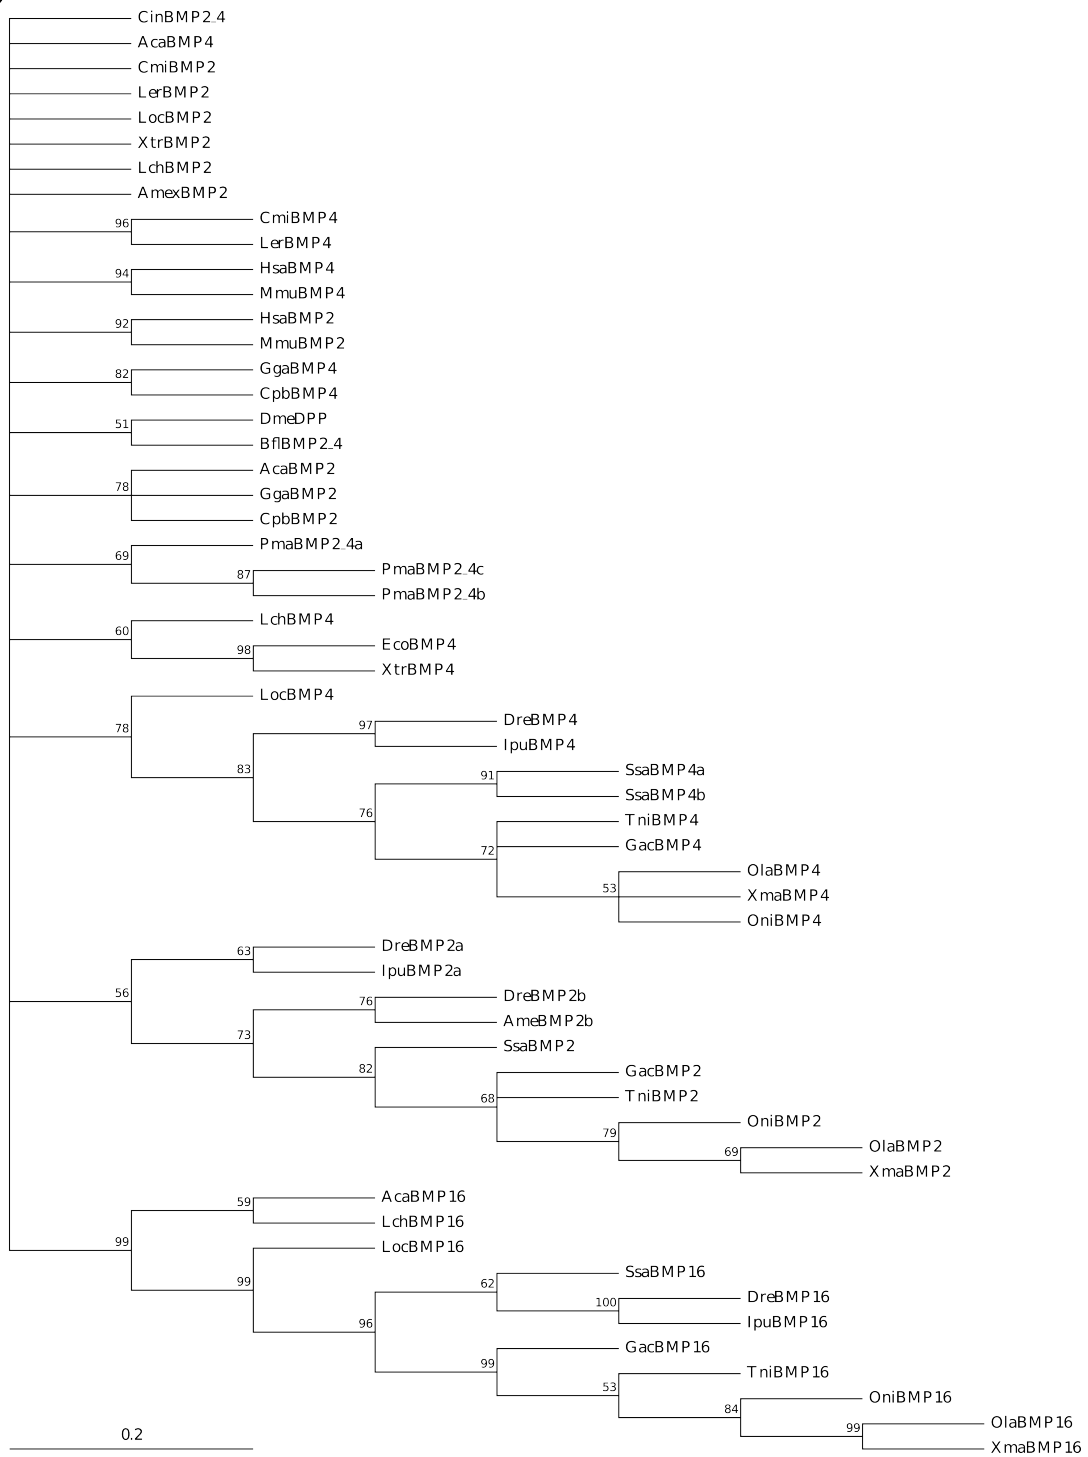

**c**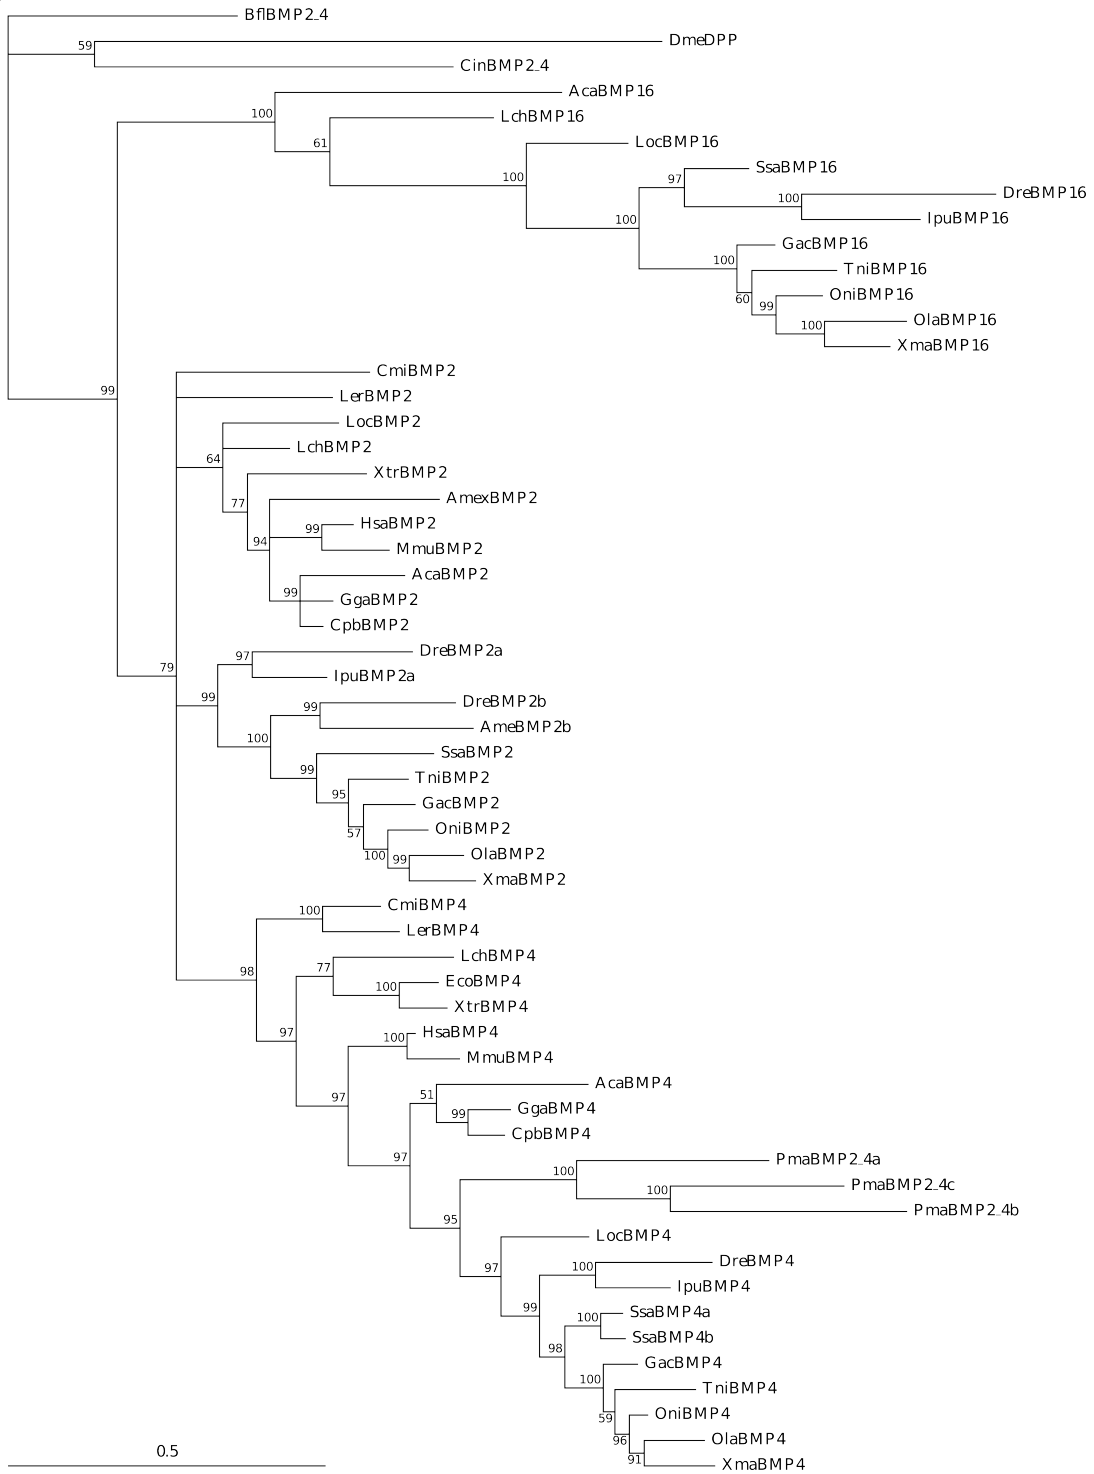

**d**

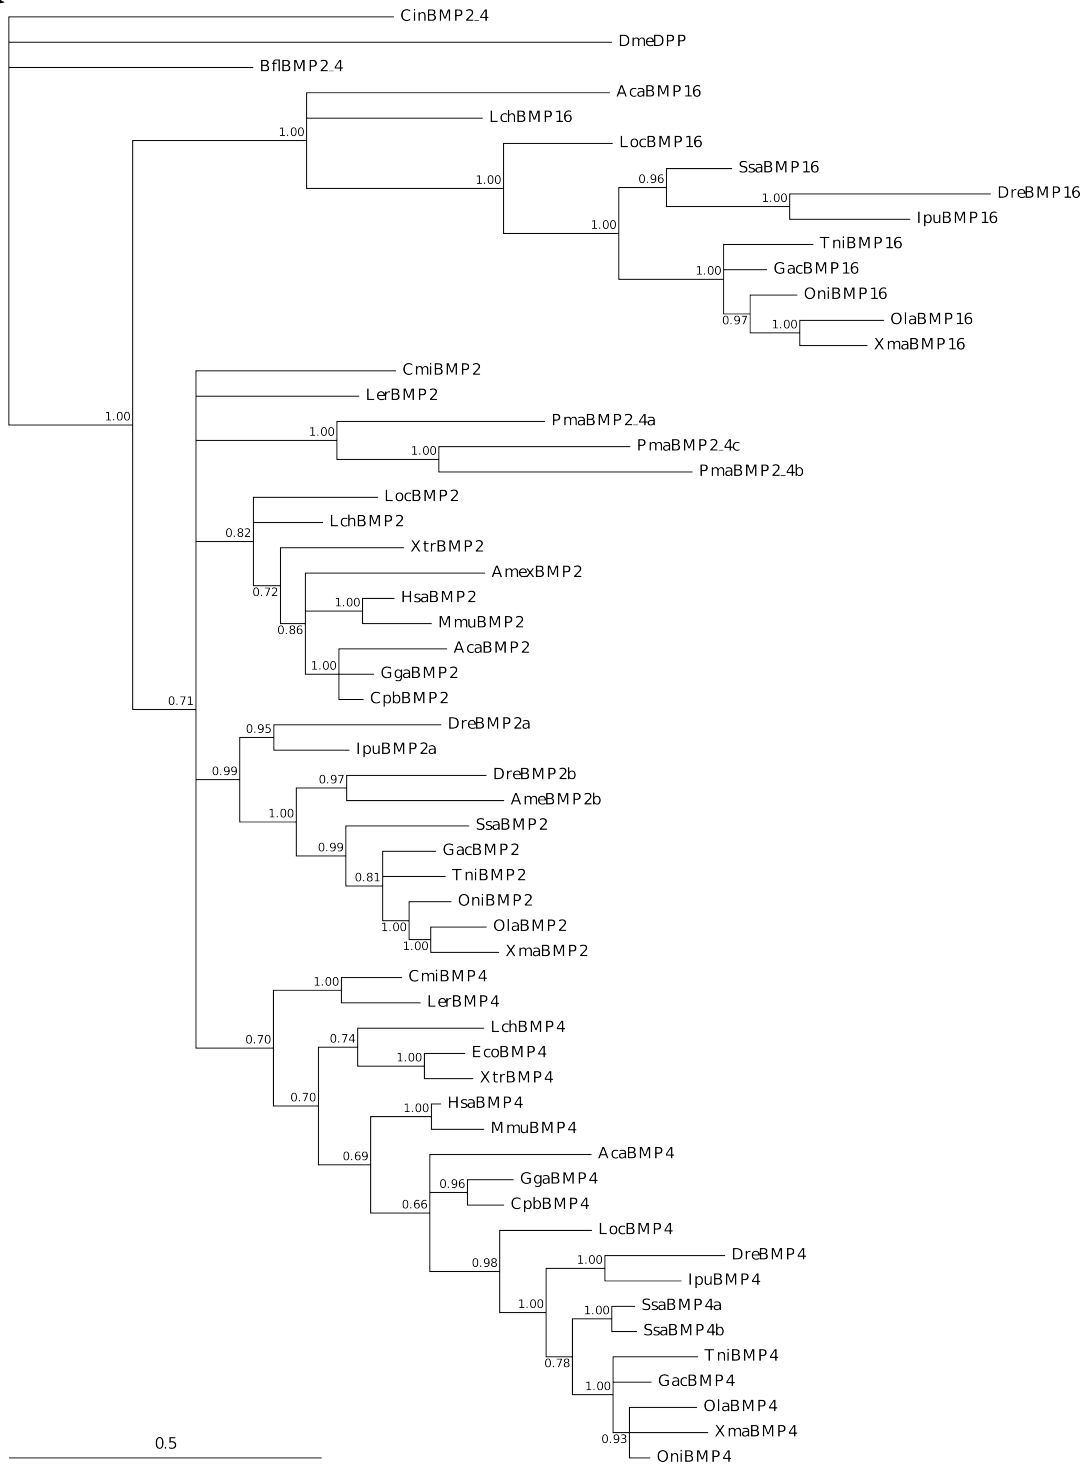

**e**

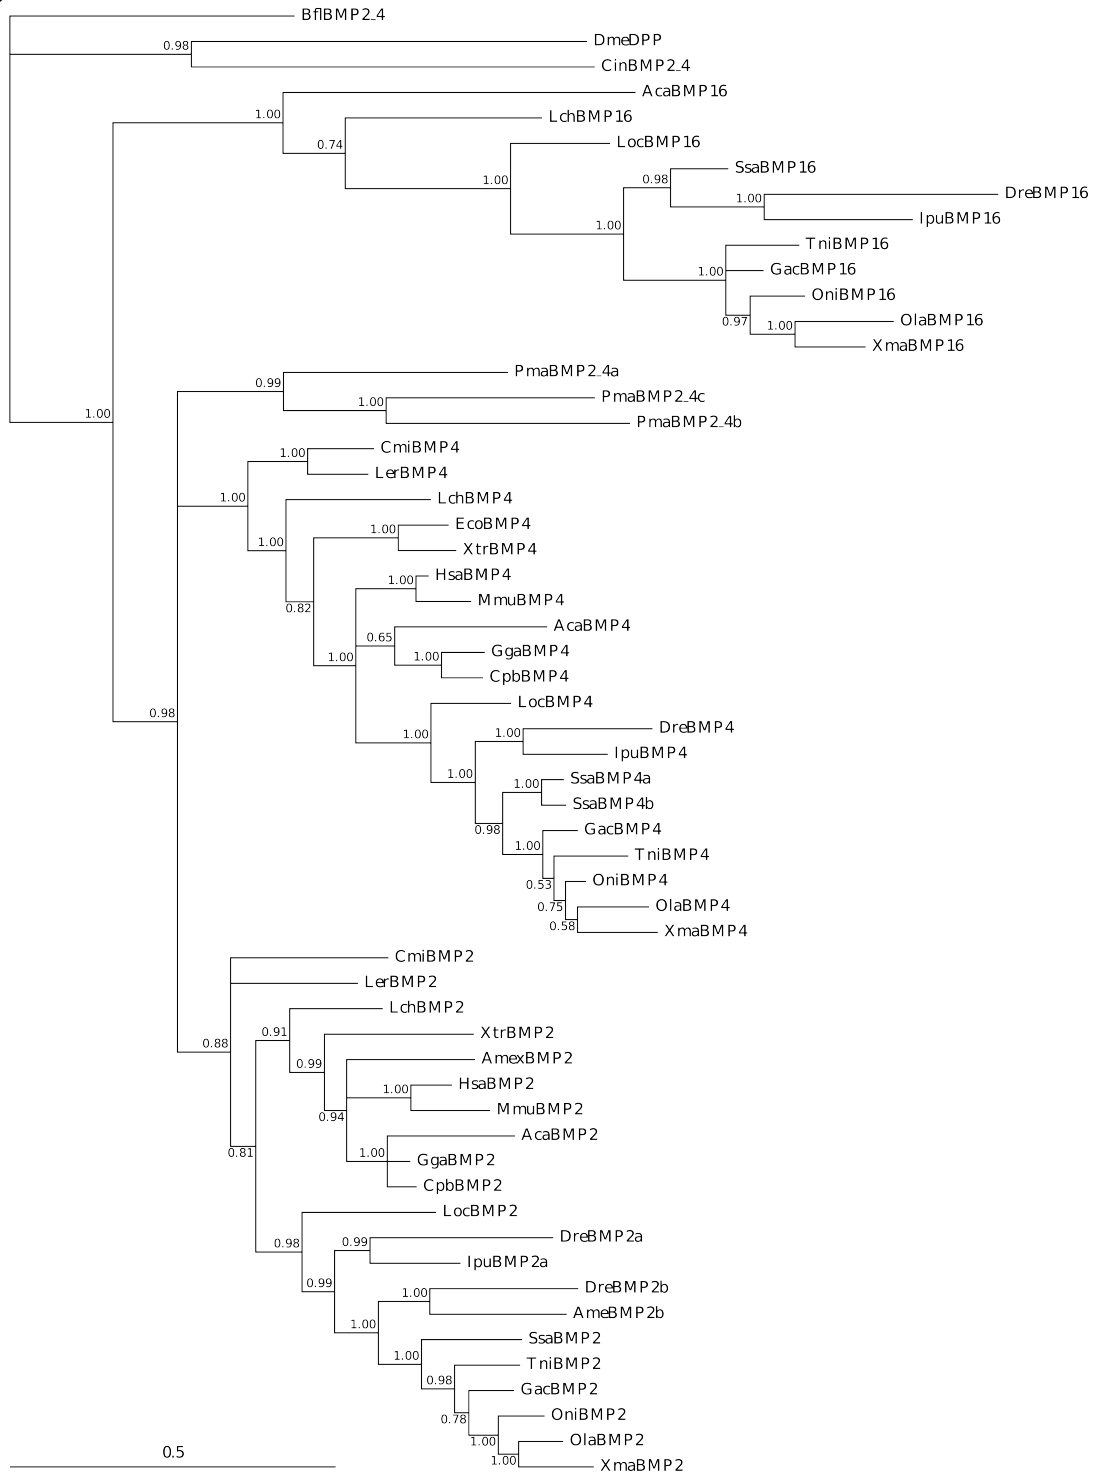

Supplement: 18_2015_2024_MOESM2_ESM.pdf [file 18_2015_2024_MOESM2_ESM.pdf]
