# Supplementary material
Source: PubMed Central journal article supplement (PMC11108344)
Supplement: 18_2015_2024_MOESM3_ESM.pdf [file 18_2015_2024_MOESM3_ESM.pdf]

**Supplementary Table 4.2.1.** Z-DOPE and QMEAN scores for the zebrafish BMP2, BMP4, BMP16 protein models.

| <b>Model</b> | <b>Z-DOPE score<sup>1</sup></b> | <b>QMEAN score<sup>2</sup></b> |
|--------------|---------------------------------|--------------------------------|
| BMP2a        | -0.659                          | 0.669 (-0.96)                  |
| BMP2b        | -0.746                          | 0.623 (-1.42)                  |
| BMP4         | -0.710                          | 0.621 (-1.44)                  |
| BMP16        | -0.260                          | 0.646 (-1.21)                  |

1 – The Z-DOPE score (Benkert et al., 2008) should be negative for acceptable quality models, and <-1 is usually seen for native structures

2 – The QMEAN score (Shen and Sali, 2006) ranges from 0 (worst) to 1 (best). Values in parenthesis are Z-scores based on a distribution of QMEAN scores for a set of experimentally determined structures (Z>-1.5 denote good models).

References:

Benkert P, Tosatto SCE, Schomburg D (2008). QMEAN: A comprehensive scoring function for model quality assessment *Proteins: Structure, Function, and Bioinformatics*. 71:261-277.

Shen MY, Sali A (2006) Statistical potential for assessment and prediction of protein structures. *Protein Sci*. 15: 2507-2524.
